# Supplementary material for: Effect of prepregnancy maternal BMI on adverse pregnancy and neonatal outcomes: results from a retrospective cohort study of a multiethnic population in Qatar
Source: PubMed Central journal article supplement — BMJ Open. 2019 Sep 8;9(9):e029757. doi: 10.1136/bmjopen-2019-029757 (PMC6738680; doi:10.1136/bmjopen-2019-029757), 2019-09-08
Supplement: bmjopen-2019-029757.draft_revisions.pdf [file bmjopen-2019-029757.draft_revisions.pdf]

# BMJ Open

BMJ Open is committed to open peer review. As part of this commitment we make the peer review history of every article we publish publicly available.

When an article is published we post the peer reviewers' comments and the authors' responses online. We also post the versions of the paper that were used during peer review. These are the versions that the peer review comments apply to.

The versions of the paper that follow are the versions that were submitted during the peer review process. They are not the versions of record or the final published versions. They should not be cited or distributed as the published version of this manuscript.

BMJ Open is an open access journal and the full, final, typeset and author-corrected version of record of the manuscript is available on our site with no access controls, subscription charges or pay-per-view fees (<http://bmjopen.bmj.com>).

If you have any questions on BMJ Open's open peer review process please email [info.bmjopen@bmj.com](mailto:info.bmjopen@bmj.com)

# BMJ Open

## Effect of pre-pregnancy maternal bmi on adverse pregnancy and neonatal outcomes: results from a multi-ethnic population

|                               |                                                                                                                                                                                                                                                   |
|-------------------------------|---------------------------------------------------------------------------------------------------------------------------------------------------------------------------------------------------------------------------------------------------|
| Journal:                      | <i>BMJ Open</i>                                                                                                                                                                                                                                   |
| Manuscript ID                 | bmjopen-2019-029757                                                                                                                                                                                                                               |
| Article Type:                 | Research                                                                                                                                                                                                                                          |
| Date Submitted by the Author: | 10-Feb-2019                                                                                                                                                                                                                                       |
| Complete List of Authors:     | Shaukat, Shazia; Qatar University, College of Health Sciences, Department of Public Health<br>Nur, Ula; Qatar University, Public Health                                                                                                           |
| Keywords:                     | PUBLIC HEALTH, EPIDEMIOLOGY, HEALTH SERVICES ADMINISTRATION & MANAGEMENT, Health policy < HEALTH SERVICES ADMINISTRATION & MANAGEMENT, Quality in health care < HEALTH SERVICES ADMINISTRATION & MANAGEMENT, Community child health < PAEDIATRICS |
|                               |                                                                                                                                                                                                                                                   |

SCHOLARONE™  
Manuscripts

1  
2  
3 **Effect of pre-pregnancy maternal BMI on adverse pregnancy and neonatal**  
4 **outcomes: results from a multi-ethnic population**  
5  
6  
7

8  
9  
10 Shazia Shaukat<sup>1</sup> and Ula Nur<sup>1</sup>  
11

12  
13 <sup>1</sup>Department of Public Health, College of Health Sciences, Qatar University, Doha, Qatar  
14

15  
16  
17 Correspondance to: Ula Nur, Department of Public Health, College of Health Sciences, Qatar  
18

19 University, Doha, Qatar  
20

21 Ula.nur@qu.edu.qa  
22

23  
24 *Key words: Maternal BMI, Pregnancy Outcomes, Nulliparous, Maternal Health*  
25

26 Word Count: 3051  
27  
28  
29  
30  
31  
32  
33  
34  
35  
36  
37  
38  
39  
40  
41  
42  
43  
44  
45  
46  
47  
48  
49  
50  
51  
52  
53  
54  
55  
56  
57  
58  
59  
60

## Abstract

**Objectives** Given the small number of studies on the topic, we aimed to identify the impact of pre-pregnancy maternal body mass index (BMI) on adverse pregnancy outcomes (POs) in a low-risk, multiethnic population, and to calculate related population attributable fractions (PAFs).

**Methods** This retrospective cohort study included 1134 nulliparous women of 50 nationalities (classified into Arab and non-Arab ethnicity) in Qatar who had their first antenatal visit at a Primary Health Care Corporation (PHCC) facility in June 2016-March 2017 and their PO at a Hamad Medical Corporation (HMC) facility before 10 November 2017. We used multiple imputation to handle missing values and multivariate logistic regression to calculate adjusted odds ratios (aOR) for adverse POs in overweight and obese women.

**Results** Overweight and obese Arab women were at high risk for gestational diabetes mellitus (GDM) (aOR=2.38, 95%CI 1.51–3.84) and cesarean section (aOR=1.57, 95%CI 1.00–2.48). Obese non-Arab women were at high risk for preeclampsia (aOR=3.83, 95%CI 1.00–15.00). PAFs showed that 41.63% of preeclampsia, 17.36% of pregnancy-induced hypertension, 17.17% of large for gestational age, 15.89% of preterm deliveries, 14.75% of GDM, and 13.99% of cesarean sections could be avoided if all mothers had normal pre-pregnancy BMI. There were no major differences in PAFs by ethnicity.

**Conclusion** Adverse POs were attributable to maternal obesity. This suggests that, in contrast to existing PHCC protocol, overweight and obese women in Qatar should be targeted earlier in their pregnancy; preferably prior to getting pregnant. We observed ethnic differences in the risk of adverse POs.

### Strengths and Limitations of this Study

- Overweight and obese nulliparous mothers who are at risk of maternal and neonatal complications and who attended PHCC between June were identified using body mass index cut offs specific for a multi-ethnic diverse population.
- Risks of maternal and neonatal complications were compared between Arab and Non-Arab maternal ethnic groups
- The method of multiple imputation was used to handle missingness of incomplete variables
- The study used nationality as a surrogate for ethnicity which was valid in this sample given the dichotomous nature of the grouping used.
- Information was not available on socioeconomic status a known potential confounder.

## INTRODUCTION

More than half of women of child bearing age in the developed world are either overweight or obese<sup>1</sup>, and the percentage of women who are obese at their first antenatal visit nearly doubled between 1990 and 2004<sup>2</sup>. Maternal obesity has been associated with infertility and can cause spontaneous pregnancy loss in early gestation<sup>3</sup>. Gestational diabetes<sup>4</sup>, preeclampsia<sup>5</sup>, gestational hypertension, depression, instrumental vaginal delivery, cesarean section delivery<sup>6</sup>, and surgical site infection have been associated with maternal obesity<sup>7</sup>. Maternal obesity can also impact neonatal outcomes, such as pre-term birth, large for gestational age babies, fetal defects, congenital anomalies, and perinatal death. Length of hospital stay was also reported as an adverse outcome of maternal obesity<sup>7</sup>.

Most published studies on the effect of obesity on pregnancy outcomes have focused on primarily homogenous regional populations that are not ethnically diverse<sup>8</sup>, but some researchers have shown that ethnic differences can have an impact on the association between obesity and adverse pregnancy outcomes<sup>9</sup>. This impact is particularly relevant for countries like Qatar, which has a diverse, multiethnic, transient population. The 2012 World Health Organization (WHO) STEPwise approach to Surveillance survey for Qatar showed that 68.3% of adult females were overweight and 43.2% were obese<sup>10</sup>, highlighting the significance of the maternal obesity problem in the country. The public health care system in Qatar is broken down into primary and secondary/tertiary care systems, with primary care administered by the Primary Health Care Corporation (PHCC), and secondary/tertiary care administered by the Hamad Medical Corporation (HMC). Both systems classify pregnancies as high-risk when the mother is obese Class II or higher (body mass index [BMI]  $\geq 40$  kg/m<sup>2</sup>), has a pre-existing medical condition, and/or obstetric complications, as per the guidelines of the Ministry of Health. Women with high-risk pregnancies

1  
2  
3 are directly referred to dedicated antenatal clinics of the HMC for specialized management.  
4  
5 However, women with a BMI  $<40$  kg/m<sup>2</sup>, but who are still overweight or obese, are cared for  
6  
7 through the PHCC; they are referred to the HMC only if they develop complications or for  
8  
9 delivery.  
10

11  
12 Population attributable fractions (PAFs) are used to identify the burden of risk factors for a  
13  
14 disease or condition in a given population<sup>11</sup>. Few studies have looked at PAFs of maternal obesity  
15  
16 <sup>12</sup>. Obesity is highly prevalent in Qatar, hence it is critical to study PAFs associated with obesity  
17  
18 in different ethnic groups to quantify the burden of disease that can be attributed to obesity, and  
19  
20 thereby help develop targeted management strategies. We aimed to identify the impact of pre-  
21  
22 pregnancy maternal BMI on adverse pregnancy outcomes in a low-risk, multiethnic population,  
23  
24 and to calculate related PAFs.  
25  
26  
27  
28  
29  
30  
31  
32  
33  
34  
35  
36  
37  
38  
39  
40  
41  
42  
43  
44  
45  
46  
47  
48  
49  
50  
51  
52  
53  
54  
55  
56  
57  
58  
59  
60

## METHODS

The PHCC Database is linked to the Birth Register of Qatar; it includes information on all PHCC visits, and thus includes pre-pregnancy and maternal characteristics (e.g., age, nationality, pre-existing conditions), and pregnancy and neonatal outcomes. For this retrospective cohort study, we used the PHCC Database to identify all nulliparous women with singleton pregnancies who had their first antenatal visit at a PHCC facility between 1 June 2016 and 1 March 2017 and their pregnancy outcome at a HMC facility before 10 November 2017 (n=1245). We wanted to target women with low-risk pregnancies as defined by the Ministry of Health of Qatar. Therefore we excluded women with high-risk pregnancies, i.e., those with a pregnancy outcome prior to 24 weeks of gestation (n=8), those who were obese Class II and higher (BMI  $\geq$ 40 kg/m<sup>2</sup>, n=80), or who were under the age of 18 at their first antenatal visit (n=23). Women who gave birth to babies with indeterminate sex (n=2), or who experienced still birth (n=3), fetal death (n=4), or neonatal death (n=1) were also excluded. Among the exclusions were 10 women who met more than one exclusion criterion; therefore, the final study sample consisted of 1,134 women. Ethical approval was obtained from Qatar Primary Health Care Corporation (PHCC) (No: PHCC/RS/17/07/007) and from the Institutional Review Board (IRB) at Qatar University (No.: QU-IRB 846-E/17).

### Patient and Public Involvement

This study involved secondary analysis of data collected by PHCC during its routine interactions with the patients. No additional patient or public contact was undertaken in this study.



### **Maternal ethnicity**

Included women were of 50 unique nationalities, and maternal ethnicity was categorized as Arab or non-Arab based on nationality. Women were designated as Arab if they were citizens of one of the 22 countries included in the list of League of Arab States (LAS)<sup>13</sup>. Our Arab study women came from 18 of these countries (Algeria, Bahrain, Egypt, Iraq, Jordan, Kuwait, Lebanon, Libya, Morocco, Oman, Palestine, Qatar, Saudi Arabia, Sudan, Syria, Tunis, United Arab Emirates, and Yemen). The LAS have a common language (Arabic) and share a number of cultural, social, and dietary habits which may put them at different lifestyle and obesity-related risks as compared to non-Arabs. Women of other nationalities were designated as non-Arabs.

### **Pre-pregnancy body mass index**

Pre-pregnancy BMI was calculated based on information recorded at the most recent pre-pregnancy visit available in the PHCC Database, and categorized as normal weight (BMI <25 kg/m<sup>2</sup>) overweight (BMI 25-29.99 kg/m<sup>2</sup>), and obese (BMI ≥30) based on standard WHO guidelines<sup>14</sup>. However, different BMI cut-offs were applied to Asians (n=405, overweight: BMI 23-27.5 kg/m<sup>2</sup>; obese: BMI ≥27.5 kg/m<sup>2</sup>), as recommended by the WHO expert consultation<sup>15</sup>. Sensitivity analyses, the results of which are not presented in this manuscript, showed that our application of different BMI cut-offs for Asians was valid, as using standard cut-offs underestimated the risk in that population.

### **Adverse pregnancy outcomes, adverse neonatal outcomes, and risk factors**

Investigated adverse pregnancy outcomes included GDM, pregnancy-induced hypertension (PIH), preeclampsia, preterm delivery, assisted vaginal delivery, and cesarean section. Investigated

1  
2  
3 adverse neonatal outcomes included macrosomia, large for gestational age, small for gestational  
4 age, neonatal intensive care unit referrals, and Apgar score <7 at 1 minute. Risk factors considered  
5 included maternal age, maternal ethnicity, and pre-existing conditions such as diabetes mellitus  
6 type 1 or 2, hypertension, and thyroid conditions.  
7  
8  
9  
10  
11  
12

### 13 **Statistical analysis**

14  
15  
16 Maternal characteristics and risk factors were tabulated using the observed data, and differences  
17 in the demographics across BMI categories were compared using Pearson's chi squared test.  
18 Thereafter, as pre-pregnancy BMI was not available for 101 (8.9%) of the study subjects, multiple  
19 imputation was performed to assign these values, with the underlying assumption that BMI values  
20 were missing at random<sup>17 18</sup>. Univariate and multivariate associations between maternal BMI  
21 category and adverse pregnancy and neonatal outcomes were assessed by logistic regression, using  
22 the imputed dataset.  
23  
24  
25  
26  
27  
28  
29  
30  
31

32 Known and potential risk factors such as maternal age at first antenatal visit, pre-existing  
33 diabetes mellitus type 1 or 2, pre-existing hypertension, and pre-existing thyroid conditions were  
34 included as covariates in the final model. Maternal ethnicity was assessed as potential risk factor  
35 while computing adjusted odds ratios (ORs) for associations between BMI category and adverse  
36 pregnancy and neonatal outcomes. Subgroup analysis was conducted by computing crude and  
37 adjusted ORs for adverse pregnancy and neonatal pregnancy outcomes separately for Arab and  
38 Non-Arab mothers.  
39  
40  
41  
42  
43  
44  
45  
46  
47

48 The adjusted ORs were used to compute PAFs of overweight and obesity for Arab and non-  
49 Arab mothers. PAFs were used to estimate the proportion of adverse pregnancy and neonatal  
50 outcomes that could be prevented if either one of two scenarios were true<sup>16</sup>: 1) if overweight and  
51  
52  
53  
54

1  
2  
3 obese women were all of normal weight before pregnancy; 2) if overweight and obese mothers  
4 had a one-category drop in BMI before pregnancy (i.e., obese to overweight, and overweight to  
5 normal weight). Scenario 0 was denoted the reference scenario, i.e., the current population as  
6 represented by the data. These scenarios were also analysed by ethnicity.  
7  
8  
9

10 PAFs and corresponding 95% confidence intervals (CIs) were computed using a user-written  
11 procedure (punaf) in the Stata software<sup>16</sup>. All analyses in this research report were performed using  
12 the Stata 15<sup>19</sup> software package and Microsoft Excel. The significance level for this study was set  
13 at 5%, so p-value  $\leq 0.05$  was considered statistically significant.  
14  
15  
16  
17  
18  
19  
20  
21  
22  
23  
24

## 25 RESULTS

26  
27 In our study sample, 86.33% of women were aged 18-30 years and 59.17% were of Arab ethnicity.  
28 The study sample included women from 50 countries, representing an extremely diverse data set.  
29 The most common risk factor among obese women was pre-existing thyroid conditions (5.22%).  
30 Term deliveries (gestational age 37-41 weeks) accounted for 89.77% of births in the study sample  
31 (Table 1a).  
32  
33

34 GDM was the most common adverse pregnancy outcome and was observed in 35.89% of the study  
35 sample, followed by cesarean section (24.96%). Preeclampsia was observed in 3.44% of the study  
36 sample. The prevalence of GDM, cesarean section, and preeclampsia increased with increasing  
37 BMI category (Table 1b).  
38

39 Obese Arab mothers had statistically significant, higher odds of developing GDM (adjusted  
40 OR=2.41, 95% CI 1.51–3.84,  $p < 0.01$ ) when compared to normal-weight Arab mothers. Although  
41 the odds were higher for obese non-Arab mothers when compared to their normal-weight  
42  
43  
44  
45  
46  
47

1  
2  
3 counterparts (adjusted OR=1.58, 95% CI 0.96–2.62, p=0.07), these odds were not as high as those  
4  
5 observed for Arab mothers, and the association was not statistically significant. Obese non-Arab  
6  
7 women showed significantly higher odds (adjusted OR=3.83, 95% CI 0.98–15.00, p=0.05) of  
8  
9 developing preeclampsia when compared to normal-weight non-Arab women. Finally, the odds of  
10  
11 cesarean section were significant among overweight Arab mothers, as compared to their normal-  
12  
13 weight counterparts (adjusted OR=1.57, 95% CI 1.00–2.48, p=0.05), but this association was not  
14  
15 significant among obese Arab mothers or among obese non-Arab mothers when compared to their  
16  
17 normal-weight counterparts (Table 2). Although higher odds were observed in overweight and  
18  
19 obese mothers in both ethnic groups (Figure 1), p-values were not statistically significant for most  
20  
21 adverse pregnancy or neonatal outcomes when compared to normal-weight counterparts.  
22  
23  
24  
25  
26  
27

### 28 **Population attributable fractions**

29  
30 For preeclampsia, a one-category reduction in BMI among Arab mothers corresponded to a PAF  
31  
32 of 46.28% for obese women and 38.61% for overweight women. For PIH, a one-category drop in  
33  
34 BMI for obese women corresponded to a PAF of 50.83%, meaning that 50.83% of PIH cases could  
35  
36 be avoided if obese mothers reduced their BMI category to overweight. Corresponding PAFs for  
37  
38 neonatal outcomes were 65.23% for macrosomia and 30.42% for Apgar score <7 at 1 minute.  
39  
40 Some of the CIs and PAFs were negative (e.g., small for gestational age and assisted vaginal  
41  
42 delivery), indicating a protective effect of obesity on these outcomes, which means that removing  
43  
44 obesity could increase these risks (Tables 3 and 4).  
45  
46  
47  
48

49 For GDM, a one-category reduction in BMI corresponded to a PAF of 24.72% and 24.58% for  
50  
51 obese Arab and non-Arab mothers, respectively. The PAF for macrosomia if all women were of  
52  
53 normal weight before pregnancy was 13.73% for non-Arab women, and 6.78% for Arab  
54  
55

1  
2  
3 mothers. The PAFs for neonatal outcomes after a one-category reduction in BMI are not shown  
4  
5 in the Figure, as they are mostly negative due to the small number of cases.  
6  
7  
8  
9

## 10 11 **DISCUSSION**

12  
13  
14 Our study confirms that there is an association between pre-pregnancy maternal BMI and adverse  
15 pregnancy and neonatal pregnancy outcomes in multiethnic populations, using adjusted ORs and  
16 PAFs. Previous studies have shown similar strengths of association between overweight and  
17 PAFs. Previous studies have shown similar strengths of association between overweight and  
18 obesity and GDM<sup>20</sup>, PIH<sup>20,23</sup>, preterm delivery<sup>12,22</sup>, assisted vaginal delivery<sup>20,21</sup>, cesarean section<sup>20</sup>  
19  
20  
21  
22  
23  
24  
25  
26  
27  
28  
29  
30  
31  
32  
33  
34  
35  
36  
37  
38  
39  
40  
41  
42  
43  
44  
45  
46  
47  
48  
49  
50  
51  
52  
53  
54  
55  
56  
57  
58  
59  
60  
to preeclampsia<sup>24</sup>.

Our results confirm those of a recent study on nulliparous women in Qatar, which reported a  
higher incidence of GDM, cesarean section, and PIH in obese women<sup>25</sup>, whereas overweight  
women were reported to have higher cesarean section rates only<sup>25</sup>. However, the overall incidence  
of these outcomes was much lower than in our study sample (GDM: 15% vs 35.89% in our study  
sample; cesarean section: 16% vs 24.98%). These difference cannot be explained by the data alone,  
since the earlier study<sup>25</sup> was carried out in a tertiary care setting, whereas this research focused on  
primary care settings.

The PAFs we report are much higher than those from some published studies<sup>12</sup>, due to the high  
prevalence of overweight and obesity (i.e., exposure) in our study sample. Preeclampsia stands  
out, as any reduction in BMI category yielded a substantial reduction in the burden of this

1  
2  
3 condition. A one-category reduction in BMI showed a much higher possibility of disease reduction  
4 among obese women than among overweight women, whether they were Arab or non-Arab.  
5  
6 However, cesarean section was an exception to this trend, and showed a lesser PAF for a one-  
7  
8 category reduction in BMI among obese women than overweight women. This can be explained  
9  
10 by the higher OR for cesarean section in overweight women as compared to obese women in both  
11  
12 ethnic groups. It should be noted that a causal relationship between exposures and outcomes is  
13  
14 generally assumed in PAF calculations. However, this relationship may not necessarily exist, and  
15  
16 PAFs should be considered accordingly.  
17  
18  
19  
20

21  
22 Unlike other reports, the exposure variable in our study was not self-reported. We used  
23  
24 standard WHO recommended BMI cut-offs, except in the Asian population, in which Asian-  
25  
26 specific cut-offs were applied. Results of a sensitivity analysis indicated that the use of these Asian-  
27  
28 specific cut-offs is indeed clinically important in multiethnic populations. Indeed, Asian mothers  
29  
30 must be classified as overweight and obese using the WHO-recommended cut-offs for Asians,  
31  
32 otherwise high-risk patients may not be properly identified during antenatal care.  
33  
34

35  
36 Patient nationality was used as a surrogate for ethnicity, but it is common for people to change  
37  
38 their citizenship through immigration, which could have limited the strength of the conclusions of  
39  
40 this study. However, a detailed analysis of nationalities revealed that the number of patients  
41  
42 claiming citizenship to countries that are most likely targets for migrants was minimal  
43  
44 (Canadians=0, Australians=0, Americans=3, British=1, French=1). Therefore, the use of  
45  
46 nationality as a surrogate for ethnicity is reasonable and valid for this dataset.  
47  
48

49  
50 Other reports from Qatar showed higher rates of conditions such as diabetes mellitus and  
51  
52 cardiovascular diseases, which were not reflected in our study. These low rates may represent an  
53  
54 information bias which did not allow us to properly adjust for potential confounders. Data on  
55

1  
2  
3 socioeconomic status and health center location were not available; hence it is not possible to  
4  
5 attribute missing values to these factors or to any other variables for which data was not  
6  
7 available.  
8  
9

10 GDM, preeclampsia, and cesarean section were significantly associated with pre-pregnancy  
11  
12 BMI among our overweight and obese mothers, who are not generally considered to have at-risk  
13  
14 pregnancies by the health care system in Qatar. High prevalence of GDM in normal-weight  
15  
16 mothers (29.21%) indicates that BMI alone cannot explain the problem, which is instead related  
17  
18 to population norms and characteristics. High risk of preeclampsia in overweight and obese  
19  
20 mothers, especially among non-Arabs, indicates that early screening and management of  
21  
22 hypertensive disorders is needed for this group. This implies that clinical screening is indicated  
23  
24 for all mothers regardless of their pre-pregnancy BMI or ethnicity, preferably at the start of  
25  
26 pregnancy.  
27  
28  
29

30  
31 The rate of cesarean section was very high in our study sample (25%), especially considering  
32  
33 that pregnancies in overweight and obese women are currently considered low-risk by the health  
34  
35 care system in Qatar. The odds of cesarean section were uncharacteristically high and similar in  
36  
37 overweight and obese mothers regardless of ethnicity. Clinical implications cannot be drawn  
38  
39 from these results without properly separating the cesarean sections by their indications  
40  
41 (medically necessary vs elective), which were not available in the study sample. Our findings of  
42  
43 an association between pre-pregnancy maternal BMI and cesarean section may not properly  
44  
45 represent the true nature of the outcome risk and exposure, and should therefore be interpreted  
46  
47 with caution.  
48  
49  
50

51 Adverse pregnancy outcomes were attributable to maternal obesity for even low risk patients.  
52  
53 This suggests that, in contrast to the existing PHCC protocol which focuses only on high-risk  
54  
55

1  
2  
3 pregnancies for intervention, overweight and obese women in Qatar should also be targeted earlier  
4  
5 in their pregnancy, preferably prior to getting pregnant. We observed ethnic differences in the risk  
6  
7 of adverse pregnancy outcomes. Planning and prevention approaches at the pre-conception stage  
8  
9 are needed to raise awareness and reduce the burden of these adverse outcomes on the health care  
10  
11 system. There is a need for an ecological approach that addresses societal, cultural, and personal  
12  
13 influences by promoting good health at all levels. A top-down approach would work best to  
14  
15 formulate public health policy to combat the issues raised. A combination of these public health  
16  
17 interventions can help achieve the WHO Non-Communicable Disease Targets for the Global  
18  
19 Action Plan by 2025.  
20  
21  
22

### 23 24 **Contributors**

25  
26 SS collected data carried out the literature review, and prepared the draft of the paper.  
27  
28 SS and UN planned data analysis and SS implemented statistical analysis.  
29  
30 UN provided input and feedback on the content, data analysis and on the paper draft. SS and UN  
31  
32 read and approved the final manuscript.

### 33 34 **Funding**

35  
36 This work was supported by Qatar University Grant Number QUST-1-CHS-2018-14.

37  
38 **Competing interests** None declared.

39  
40 **Patient consent for publication** Nor required.

41  
42 **Provenance and peer reviewed** Not commissioned; externally peer reviewed.

43  
44  
45 **Data sharing agreement** The dataset set generated during the current study are available by  
46  
47 request from Qatar Primary Health Care Corporation (PHCC).  
48  
49  
50  
51  
52  
53  
54



## References

1. Finucane MM, Stevens GA, Cowan MJ, et al. National, regional, and global trends in body-mass index since 1980: systematic analysis of health examination surveys and epidemiological studies with 960 country-years and 9· 1 million participants. *The Lancet* 2011;377(9765):557-67.
2. Kanagalingam MG, Forouhi NG, Greer IA, et al. Changes in booking body mass index over a decade: retrospective analysis from a Glasgow Maternity Hospital. *BJOG: An International Journal of Obstetrics & Gynaecology* 2005;112(10):1431-33. doi: 10.1111/j.1471-0528.2005.00685.x
3. Catalano PM, Shankar K. Obesity and pregnancy: mechanisms of short term and long term adverse consequences for mother and child. *BMJ* 2017;356:j1.
4. Torloni M, Betrán A, Horta B, et al. Prepregnancy BMI and the risk of gestational diabetes: a systematic review of the literature with meta-analysis. *Obesity Reviews* 2009;10(2):194-203.
5. O'brien TE, Ray JG, Chan W-S. Maternal body mass index and the risk of preeclampsia: a systematic overview. *Epidemiology* 2003;14(3):368-74.
6. Poobalan AS, Aucott LS, Gurung T, et al. Obesity as an independent risk factor for elective and emergency cesarean delivery in nulliparous women – systematic review and meta-analysis of cohort studies. *Obesity Reviews* 2009;10(1):28-35. doi: 10.1111/j.1467-789X.2008.00537.x
7. Marchi J, Berg M, Dencker A, et al. Risks associated with obesity in pregnancy, for the mother and baby: a systematic review of reviews. *Obesity Reviews* 2015;16(8):621-38. doi: 10.1111/obr.12288

- 1  
2  
3 8. Knight M, Kurinczuk JJ, Spark P, et al. Inequalities in maternal health: national cohort study  
4  
5 of ethnic variation in severe maternal morbidities. *BMJ* 2009;338:b542.  
6  
7
- 8 9. Makgoba M, Savvidou M, Steer P. An analysis of the interrelationship between maternal age,  
9  
10 body mass index and racial origin in the development of gestational diabetes mellitus.  
11  
12 *BJOG: An International Journal of Obstetrics & Gynaecology* 2012;119(3):276-82.  
13
- 14 10. WHO. Qatar STEPS Survey 2012 - Fact Sheet: World Health Organization; 2012 [Available  
15  
16 from: [http://www.who.int/chp/steps/Qatar\\_FactSheet\\_2012.pdf](http://www.who.int/chp/steps/Qatar_FactSheet_2012.pdf)2017].  
17  
18
- 19 11. Greenland S, Drescher K. Maximum likelihood estimation of the attributable fraction from  
20  
21 logistic models. *Biometrics* 1993:865-72.  
22  
23
- 24 12. Oteng-Ntim E, Kopeika J, Seed P, et al. Impact of obesity on pregnancy outcome in different  
25  
26 ethnic groups: calculating population attributable fractions. *PLoS One* 2013;8(1):e53749.  
27  
28
- 29 13. LAS. League of Arab States 2018 [Available from:  
30  
31 <http://www.lasportal.org/en/Pages/default.aspx> accessed March 08, 2018 2018.  
32
- 33 14. WHO. Physical status: The use of and interpretation of anthropometry, Report of a WHO  
34  
35 Expert Committee. 1995  
36  
37
- 38 15. WHO Expert Consultation. Appropriate body-mass index for Asian populations and its  
39  
40 implications for policy and intervention strategies. *Lancet* 2004;363(9403):157-63. doi:  
41  
42 10.1016/S0140-6736(03)15268-3  
43  
44
- 45 16. Newson RB. Attributable and unattributable risks and fractions and other scenario  
46  
47 comparisons. *Stata J* 2013;13(4):672-98.  
48
- 49 17. Sterne JAC, White IR, Carlin JB, et al. Multiple imputation for missing data in  
50  
51 epidemiological and clinical research: potential and pitfalls. *BMJ* 2009;338 doi:  
52  
53 10.1136/bmj.b2393  
54  
55

- 1  
2  
3 18. StataCorp LP. Stata data analysis and statistical Software. *Special Edition Release*  
4  
5 2017;15:733.  
6  
7
- 8 19. Stata. Data Analysis and Statistical Software | Stata Release 15 2017 [Available from:  
9  
10 <https://www.stata.com/>.  
11
- 12 20. El-Chaar D, Finkelstein SA, Tu X, et al. The Impact of Increasing Obesity Class on  
13  
14 Obstetrical Outcomes. *Journal of Obstetrics and Gynaecology Canada* 2013;35(3):224-33.  
15  
16 doi: 10.1016/s1701-2163(15)30994-4  
17  
18
- 19 21. Li C, Liu Y, Zhang W. Joint and Independent Associations of Gestational Weight Gain and  
20  
21 Pre-Pregnancy Body Mass Index with Outcomes of Pregnancy in Chinese Women: A  
22  
23 Retrospective Cohort Study. *PLoS ONE* 2015;10(8):e0136850. doi:  
24  
25 10.1371/journal.pone.0136850  
26  
27
- 28 22. El Rafei R, Abbas HA, Charafeddine L, et al. Association of Pre-Pregnancy Body Mass  
29  
30 Index and Gestational Weight Gain with Preterm Births and Fetal Size: an Observational  
31  
32 Study from Lebanon. *Paediatric and perinatal epidemiology* 2016;30(1):38-45.  
33  
34
- 35 23. Metsälä J, Stach-Lempinen B, Gissler M, et al. Risk of Pregnancy Complications in Relation  
36  
37 to Maternal Prepregnancy Body Mass Index: Population-Based Study from Finland 2006-  
38  
39 102015.  
40  
41
- 42 24. Snowden JM, Mission JF, Marshall NE, et al. The Impact of maternal obesity and  
43  
44 race/ethnicity on perinatal outcomes: Independent and joint effects. *Obesity (Silver Spring)*  
45  
46 2016;24(7):1590-8. doi: 10.1002/oby.21532  
47  
48
- 49 25. Sharara HA, Rhaman LNA, Ummunnisa F, et al. Obese nulliparous women and the risk for  
50  
51 maternal and fetal complications. *Open Journal of Obstetrics and Gynecology* 2014;2014  
52  
53  
54  
55

## Figure legends

Figure 1: Adjusted odds ratios and 95% confidence intervals for (a) obese and (b) overweight nulliparous mothers by ethnicity

Figure 2: Population attributable fractions for Arab and non-Arab mothers for pregnancy outcomes for Scenarios 1 (all to normal weight) and Scenario 2 (one-category decrease in body mass index)

Figure 3 : Population attributable fractions for Arab and non-Arab mothers for neonatal outcomes for Scenario 2 (one-category decrease in body mass index)

## Tables legends

Table 1(a): Selected characteristics of the study sample by pre-pregnancy maternal body mass index (BMI) in Qatar (N=1134)

Table 1(b): Distribution of adverse pregnancy and neonatal outcomes by pre-pregnancy maternal body mass index (BMI) in Qatar (N=1134)

Table 2: Odds ratios (ORs) and 95% confidence intervals (CIs) of the association between adverse pregnancy and neonatal pregnancy outcomes and body mass index (BMI) category by ethnicity after multiple imputation (N=1134)

Table 3: Population attributable fractions (PAFs) % and 95% confidence intervals (CI) of adverse pregnancy and neonatal outcomes by pre-pregnancy body mass index among Arab mothers

Table 4: Population attributable fractions (PAFs) % and 95% confidence intervals (CI) of adverse pregnancy and neonatal outcomes by pre-pregnancy body mass index among non-Arab mothers

Table 1(a): Selected characteristics of the study sample by pre-pregnancy maternal body mass index (BMI) in Qatar (N=1134)

|                                                   |                 | Pre-pregnancy BMI category |                    |               |                 | Total        | P-Value          |
|---------------------------------------------------|-----------------|----------------------------|--------------------|---------------|-----------------|--------------|------------------|
|                                                   |                 | Normal Weight (N=404)      | Overweight (N=399) | Obese (N=230) | Missing (N=101) | (N=1134)     |                  |
| <b>Maternal Age (years)</b>                       |                 |                            |                    |               |                 |              | <b>&lt;0.001</b> |
|                                                   | <b>18-24</b>    | 212(52.48%)                | 141(35.34%)        | 73(31.74%)    | 48(47.52%)      | 474(41.8%)   |                  |
|                                                   | <b>25-30</b>    | 157(38.86%)                | 195(48.87%)        | 114(49.57%)   | 39(38.61%)      | 505(44.53%)  |                  |
|                                                   | <b>31-44</b>    | 35(8.66%)                  | 63(15.79%)         | 43(18.7%)     | 14(13.86%)      | 155(13.67%)  |                  |
| <b>Maternal Ethnicity</b>                         |                 |                            |                    |               |                 |              | <b>0.005</b>     |
|                                                   | <b>Arab</b>     | 254(62.87%)                | 240(60.15%)        | 114(49.57%)   | 63(62.38%)      | 671(59.17%)  |                  |
|                                                   | <b>Non-Arab</b> | 150(37.13%)                | 159(39.85%)        | 116(50.43%)   | 38(37.62%)      | 463(40.83%)  |                  |
| <b>Pre-existing Hypertension</b>                  |                 |                            |                    |               |                 |              |                  |
|                                                   | <b>Yes</b>      | 8(1.98%)                   | 10(2.51%)          | 4(1.74%)      | 2(1.98%)        | 24(2.12%)    | 0.94             |
|                                                   | <b>No</b>       | 396(98.02%)                | 389(97.49%)        | 226(98.26%)   | 99(98.02%)      | 1110(97.88%) |                  |
| <b>Pre-existing Diabetes Mellitus Type 1 or 2</b> |                 |                            |                    |               |                 |              |                  |
|                                                   | <b>Yes</b>      | 5(1.24%)                   | 4(1%)              | 4(1.74%)      | 0(0%)           | 13(1.15%)    | 0.67             |
|                                                   | <b>No</b>       | 399(98.76%)                | 395(99%)           | 226(98.26%)   | 101(100%)       | 1121(98.85%) |                  |
| <b>Pre-existing Thyroid Condition</b>             |                 |                            |                    |               |                 |              |                  |
|                                                   | <b>Yes</b>      | 18(4.46%)                  | 10(2.51%)          | 12(5.22%)     | 2(1.98%)        | 42(3.7%)     | 0.22             |
|                                                   | <b>No</b>       | 386(95.54%)                | 389(97.49%)        | 218(94.78%)   | 99(98.02%)      | 1092(96.3%)  |                  |
| <b>Gestational Age at Delivery (weeks)</b>        |                 |                            |                    |               |                 |              |                  |
|                                                   | <b>&lt;37</b>   | 32(7.92%)                  | 40(10.03%)         | 28(12.17%)    | 10(9.9%)        | 110(9.7%)    | 0.60             |
|                                                   | <b>37-41</b>    | 370(91.58%)                | 357(89.47%)        | 200(86.96%)   | 91(90.1%)       | 1018(89.77%) |                  |
|                                                   | <b>≥42</b>      | 2(0.5%)                    | 2(0.5%)            | 2(0.87%)      | 0(0%)           | 6(0.53%)     |                  |

Values shown as Number(%)

Chi<sup>2</sup> test was used to determine differences across the BMI categories

Fishers Exact test was used when cell count was <5

Table 1(b): Distribution of adverse pregnancy and neonatal outcomes by pre-pregnancy maternal body mass index (BMI) in Qatar (N=1134)

|                                       | Pre-pregnancy BMI category  |                       |                  |                    | Total<br>(N=1134) | P-Value          |
|---------------------------------------|-----------------------------|-----------------------|------------------|--------------------|-------------------|------------------|
|                                       | Normal<br>Weight<br>(N=404) | Overweight<br>(N=399) | Obese<br>(N=230) | Missing<br>(N=101) |                   |                  |
| <b>Pregnancy Outcomes</b>             |                             |                       |                  |                    |                   |                  |
| <b>Gestational Diabetes Mellitus</b>  | 118(29.21%)                 | 140(35.09%)           | 108(46.96%)      | 41(40.59%)         | 407(35.89%)       | <b>&lt;0.001</b> |
| <b>Pregnancy-Induced Hypertension</b> | 14(3.47%)                   | 14(3.51%)             | 17(7.39%)        | 1(0.99%)           | 46(4.06%)         | <b>0.038</b>     |
| <b>Preeclampsia</b>                   | 8(1.98%)                    | 14(3.51%)             | 15(6.52%)        | 2(1.98%)           | 39(3.44%)         | <b>0.013</b>     |
| <b>Preterm Delivery</b>               | 32(7.92%)                   | 40(10.03%)            | 28(12.17%)       | 8(7.92%)           | 108(9.52%)        | 0.21             |
| <b>Assisted Vaginal Delivery</b>      | 66(16.34%)                  | 62(15.54%)            | 40(17.39%)       | 11(10.89%)         | 179(15.78%)       | 0.831            |
| <b>Cesarean Section</b>               | 80(19.8%)                   | 107(26.82%)           | 69(30%)          | 27(26.73%)         | 283(24.96%)       | <b>0.008</b>     |
| <b>Neonatal Outcomes</b>              |                             |                       |                  |                    |                   |                  |
| <b>Macrosomia</b>                     | 11(2.72%)                   | 8(2.01%)              | 13(5.65%)        | 1(0.99%)           | 33(2.91%)         | <b>0.034</b>     |
| <b>Large for Gestational Age</b>      | 25(6.19%)                   | 31(7.77%)             | 23(10%)          | 7(6.93%)           | 86(7.58%)         | 0.22             |
| <b>Small for Gestational Age</b>      | 65(16.09%)                  | 55(13.78%)            | 32(13.91%)       | 22(21.78%)         | 174(15.34%)       | 0.606            |
| <b>NICU referral</b>                  | 36(8.91%)                   | 46(11.53%)            | 22(9.57%)        | 10(9.9%)           | 114(10.05%)       | 0.449            |
| <b>Apgar Score &lt;7 at 1 min,</b>    | 19(4.7%)                    | 17(4.26%)             | 14(6.09%)        | 4(3.96%)           | 54(4.76%)         | 0.582            |

Values shown as Number(%)

Chi<sup>2</sup> test was used to determine differences across the BMI categories

Abbreviations: NICU, neonatal intensive care unit.

Table 2: Odds ratios (ORs) and 95% confidence intervals (CIs) of the association between adverse pregnancy and neonatal pregnancy outcomes and body mass index (BMI) category by ethnicity after multiple imputation (N=1134)

|                                       | Arabs      |                         |             | Non-Arabs  |                         |             |
|---------------------------------------|------------|-------------------------|-------------|------------|-------------------------|-------------|
|                                       | Prevalence | Adjusted OR<br>(95% CI) | P-Value     | Prevalence | Adjusted OR<br>(95% CI) | P-Value     |
| <b>Pregnancy Outcomes</b>             |            |                         |             |            |                         |             |
| <b>Gestational Diabetes Mellitus</b>  |            |                         |             |            |                         |             |
| Overweight                            | 92(34.98%) | 1.24 (0.84 – 1.82)      | 0.28        | 64(36.99%) | 1.23(0.76 – 2.00)       | 0.40        |
| Obese                                 | 66(51.97%) | 2.38 (1.51 – 3.84)      | <0.01       | 54(43.2%)  | 1.60 (0.97 – 2.65)      | 0.07        |
| <b>Pregnancy-Induced Hypertension</b> |            |                         |             |            |                         |             |
| Overweight                            | 11(4.18%)  | 1.66 (0.63 – 4.38)      | 0.31        | 3(1.73%)   | 0.41 (0.11 – 1.61)      | 0.20        |
| Obese                                 | 4(3.15%)   | 1.21 (0.34 – 4.31)      | 0.76        | 13(10.4%)  | 2.41 (0.93 – 6.327)     | 0.07        |
| <b>Preeclampsia</b>                   |            |                         |             |            |                         |             |
| Overweight                            | 6(2.28%)   | 1.11 (0.33 – 3.71)      | 0.86        | 9(5.2%)    | 2.56 (0.66 – 9.97)      | 0.18        |
| Obese                                 | 7(5.51%)   | 2.64 (0.81 – 8.65)      | 0.11        | 8(6.4%)    | 3.83 (0.98 – 15.00)     | <b>0.05</b> |
| <b>Preterm Delivery</b>               |            |                         |             |            |                         |             |
| Overweight                            | 26(9.89%)  | 1.26 (0.66 – 2.41)      | 0.48        | 18(10.4%)  | 1.22 (0.57 – 2.61)      | 0.61        |
| Obese                                 | 14(11.02%) | 1.35 (0.63 – 2.91)      | 0.45        | 17(13.6%)  | 1.69 (0.78 – 3.68)      | 0.18        |
| <b>Assisted Vaginal Delivery</b>      |            |                         |             |            |                         |             |
| Overweight                            | 38(14.45%) | 0.94 (0.57 – 1.55)      | 0.82        | 28(16.18%) | 0.87 (0.48 – 1.58)      | 0.65        |
| Obese                                 | 20(15.75%) | 1.01 (0.55 – 1.86)      | 0.97        | 22(17.6%)  | 0.97 (0.52 – 1.81)      | 0.93        |
| <b>Cesarean Section</b>               |            |                         |             |            |                         |             |
| Overweight                            | 66(25.1%)  | 1.57 (1.00 – 2.48)      | <b>0.05</b> | 51(29.48%) | 1.05 (0.64 – 1.74)      | 0.83        |
| Obese                                 | 32(25.2%)  | 1.46 (0.83 – 2.53)      | 0.20        | 45(36%)    | 1.43 (0.84 – 2.44)      | 0.19        |
| <b>Neonatal Outcomes</b>              |            |                         |             |            |                         |             |
| <b>Macrosomia</b>                     |            |                         |             |            |                         |             |
| Overweight                            | 7(2.66%)   | 0.86 (0.30 – 2.42)      | 0.77        | 1(0.58%)   | 0.37 (0.04 – 3.39)      | 0.38        |
| Obese                                 | 6(4.72%)   | 1.48 (0.49 – 4.48)      | 0.49        | 7(5.6%)    | 3.05 (0.77 – 12.06)     | 0.11        |
| <b>Large for Gestational Age</b>      |            |                         |             |            |                         |             |
| Overweight                            | 19(7.22%)  | 1.06 (0.53 – 2.14)      | 0.87        | 15(8.67%)  | 1.52 (0.61 – 3.79)      | 0.37        |
| Obese                                 | 13(10.24%) | 1.46 (0.66 – 3.20)      | 0.35        | 12(9.6%)   | 1.75 (0.70 – 4.41)      | 0.23        |
| <b>Small for Gestational Age</b>      |            |                         |             |            |                         |             |
| Overweight                            | 34(12.93%) | 0.84 (0.49 – 1.43)      | 0.52        | 30(17.34%) | 0.93 (0.52 – 1.67)      | 0.82        |
| Obese                                 | 17(13.39%) | 0.90 (0.44 – 1.82)      | 0.77        | 19(15.2%)  | 0.84 (0.44 – 1.60)      | 0.59        |
| <b>NICU referral</b>                  |            |                         |             |            |                         |             |
| Overweight                            | 26(9.89%)  | 1.15 (0.63 – 2.11)      | 0.65        | 23(13.29%) | 1.30 (0.64 – 2.64)      | 0.46        |
| Obese                                 | 8(6.3%)    | 0.64 (0.26 – 1.55)      | 0.32        | 17(13.6%)  | 1.30 (0.61 – 2.77)      | 0.49        |
| <b>Apgar Score &lt;7 at 1 min.</b>    |            |                         |             |            |                         |             |
| Overweight                            | 13(4.94%)  | 1.24 (0.53 – 2.92)      | 0.63        | 6(3.47%)   | 0.59 (0.19 – 1.80)      | 0.47        |
| Obese                                 | 8(6.3%)    | 1.72 (0.66 – 4.46)      | 0.27        | 6(4.8%)    | 0.86 (0.30 – 2.48)      | 0.50        |

For each ethnic group, normal weight was considered the reference category (OR = 1) for calculating ORs.

All outcomes were adjusted for maternal age at first antenatal visit. In addition: pre-eclampsia for pre-existing diabetes, and pre-existing hypertension, preterm delivery for pre-existing comorbid conditions, assisted vaginal delivery for pre-existing comorbid conditions, cesarean section for pre-existing comorbid conditions, macrosomia for pre-existing diabetes, large for gestational age for pre-existing diabetes, and small for gestational age was adjusted for pre-existing diabetes and pre-existing hypertension. NICU, neonatal intensive care unit.



Table 3: Population attributable fractions (PAFs) % and 95% confidence intervals (CI) of adverse pregnancy and neonatal outcomes by pre-pregnancy body mass index among Arab mothers

|                                       | All to Normal Weight<br>(Scenario 1) | Obese to Overweight<br>(Scenario 2) | Overweight to Normal<br>(Scenario 2) |
|---------------------------------------|--------------------------------------|-------------------------------------|--------------------------------------|
| <b>Pregnancy Outcomes</b>             |                                      |                                     |                                      |
| <b>Gestational Diabetes</b>           | 13.64 (2.81 to 23.27)                | 24.72 (8.88 to 37.8)                | 12.52 (-7.28 to 28.66)               |
| <b>Pregnancy-Induced Hypertension</b> | 14.62 (-28.68 to 43.35)              | <b>50.83 (1.46 to 75.46)</b>        | -3.46 (-116.78 to 50.63)             |
| <b>Preeclampsia</b>                   | <b>40.26 (-8.34 to 67.06)</b>        | <b>46.28 (-8.98 to 73.52)</b>       | <b>38.61 (-45.72 to 74.14)</b>       |
| <b>Preterm Delivery</b>               | 15.04 (-11.09 to 35.03)              | 16.02 (-33.05 to 46.99)             | 18.14 (-28.65 to 47.91)              |
| <b>Assisted Vaginal Delivery</b>      | -3.11 (-22.13 to 12.95)              | 8.23 (-32.19 to 36.29)              | -8.5 (-50.1 to 21.57)                |
| <b>Cesarean Section</b>               | 14.09 (-0.9 to 26.86)                | 7.14 (-21.13 to 28.81)              | 19.24 (-5.27 to 38.03)               |
| <b>Neonatal Outcomes</b>              |                                      |                                     |                                      |
| <b>Macrosomia</b>                     | 6.78 (-47.09 to 40.91)               | <b>65.23 (17.74 to 85.31)</b>       | -44.54 (-257.57 to 41.58)            |
| <b>Large for Gestational Age</b>      | 16.03 (-13.93 to 38.11)              | 22.26 (-29.92 to 53.48)             | 17.23 (-38.3 to 50.46)               |
| <b>Small for Gestational Age</b>      | -7.96 (-27.51 to 8.59)               | -1.19 (-53.4 to 33.24)              | -14.47 (-61.48 to 18.85)             |
| <b>NICU referral</b>                  | 7.91 (-18.08 to 28.18)               | -25.28 (-104.33 to 23.18)           | 18.37 (-24.71 to 46.57)              |
| <b>Apgar Score &lt;7 at 1 min.</b>    | 1.67 (-37.59 to 29.73)               | <b>30.42 (-38.63 to 65.08)</b>      | -10.89 (-111.84 to 41.95)            |

Abbreviations: NICU, neonatal intensive care unit

Table 4: Population attributable fractions (PAFs) % and 95% confidence intervals (CI) of adverse pregnancy and neonatal outcomes by pre-pregnancy body mass index among non-Arab mothers

|                                        | All to Normal Weight          | Obese to Overweight            | Overweight to Normal           |
|----------------------------------------|-------------------------------|--------------------------------|--------------------------------|
| <b>Pregnancy Outcomes</b>              |                               |                                |                                |
| <b>Gestational Diabetes</b>            | 16.2 (4.79 to 26.23)          | 24.58 (8.6 to 37.77)           | 12.18 (-7.12 to 28)            |
| <b>Pregnancy -Induced Hypertension</b> | 19.98 (-26.05 to 49.2)        | <b>50.24 (1.25 to 74.93)</b>   | -3.41 (-114.55 to 50.16)       |
| <b>Preeclampsia</b>                    | <b>42.92 (-5.47 to 69.11)</b> | <b>46.42 (-9.27 to 73.73)</b>  | <b>37.79 (-44.56 to 73.23)</b> |
| <b>Preterm Delivery</b>                | 16.89 (-10.67 to 37.59)       | 15.8 (-32.54 to 46.51)         | 17.86 (-28.14 to 47.34)        |
| <b>Assisted Delivery</b>               | -2.81 (-23.22 to 14.22)       | 8.14 (-31.83 to 36)            | -8.27 (-48.48 to 21.06)        |
| <b>Cesarean Section</b>                | 13.89 (-0.47 to 26.2)         | 6.48 (-18.95 to 26.47)         | 17.19 (-4.73 to 34.53)         |
| <b>Neonatal Outcomes</b>               |                               |                                |                                |
| <b>Macrosomia</b>                      | 13.73 (-46.3 to 49.13)        | <b>65.86 (17.93 to 85.8)</b>   | -45.01 (-261.54 to 41.84)      |
| <b>Large for Gestational Age</b>       | 18.86 (-13.59 to 42.04)       | 22.44 (-30.35 to 53.85)        | 17.29 (-38.52 to 50.62)        |
| <b>Small for Gestational Age</b>       | -8.73 (-30.31 to 9.27)        | -1.13 (-50.1 to 31.86)         | -13.69 (-57.58 to 17.98)       |
| <b>NICU referral</b>                   | 7.09 (-20.53 to 28.37)        | -24.49 (-100.23 to 22.59)      | 17.79 (-23.81 to 45.41)        |
| <b>Apgar Score &lt; 7</b>              | 4.25 (-40 to 34.51)           | <b>30.53 (-38.95 to 65.27)</b> | -10.93 (-112.38 to 42.06)      |

Abbreviations: NICU, neonatal intensive care unit

1  
2  
3  
4  
5  
6  
7  
8  
9  
10  
11  
12  
13  
14  
15  
16  
17  
18  
19  
20  
21  
22  
23  
24  
25  
26  
27  
28  
29  
30  
31  
32  
33  
34  
35  
36  
37  
38  
39  
40  
41  
42  
43  
44  
45  
46  
47  
48  
49  
50  
51  
52  
53  
54  
55  
56  
57  
58  
59  
60

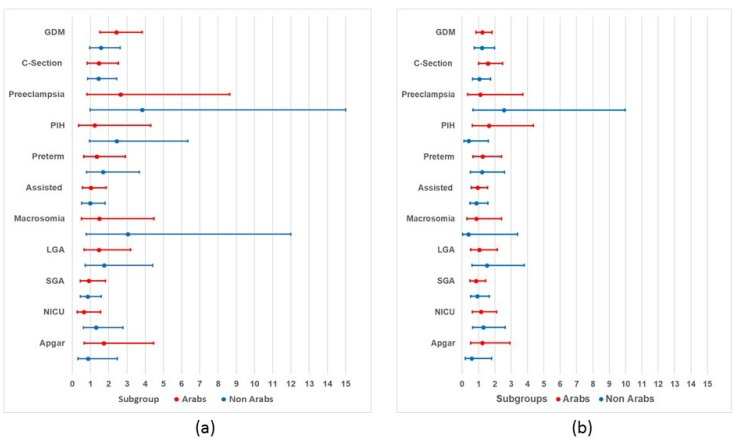

Adjusted odds ratios and 95% confidence intervals for (a) obese and (b) overweight nulliparous mothers by ethnicity

338x190mm (96 x 96 DPI)

1  
2  
3  
4  
5  
6  
7  
8  
9  
10  
11  
12  
13  
14  
15  
16  
17  
18  
19  
20  
21  
22  
23  
24  
25  
26  
27  
28  
29  
30  
31  
32  
33  
34  
35  
36  
37  
38  
39  
40  
41  
42  
43  
44  
45  
46  
47  
48  
49  
50  
51  
52  
53  
54  
55  
56  
57  
58  
59  
60

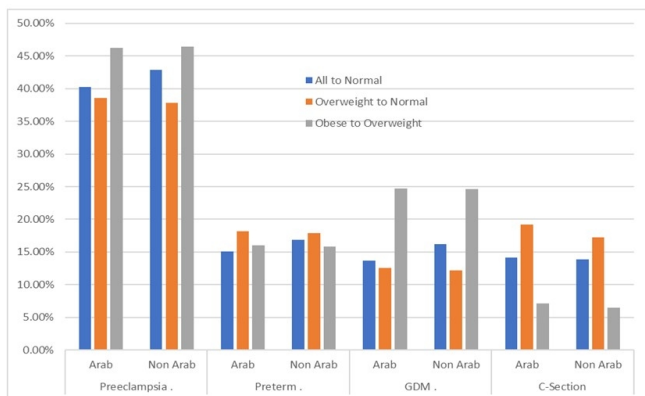

Population attributable fractions for Arab and non-Arab mothers for pregnancy outcomes for Scenarios 1 (all to normal weight) and Scenario 2 (one-category decrease in body mass index)

338x190mm (96 x 96 DPI)

1  
2  
3  
4  
5  
6  
7  
8  
9  
10  
11  
12  
13  
14  
15  
16  
17  
18  
19  
20  
21  
22  
23  
24  
25  
26  
27  
28  
29  
30  
31  
32  
33  
34  
35  
36  
37  
38  
39  
40  
41  
42  
43  
44  
45  
46  
47  
48  
49  
50  
51  
52  
53  
54  
55  
56  
57  
58  
59  
60

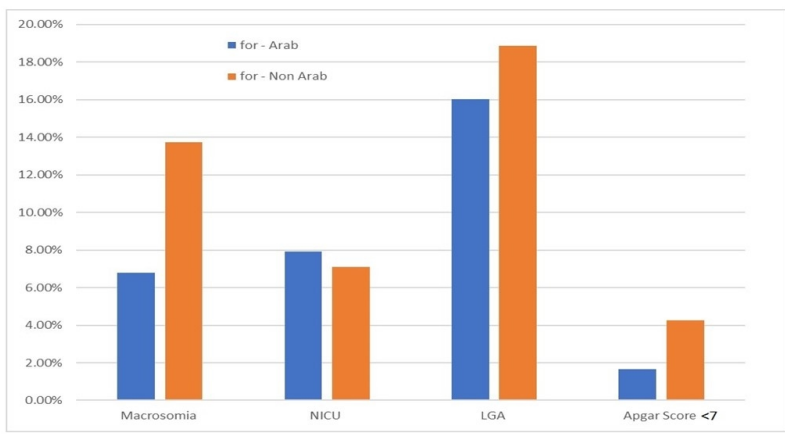

Population attributable fractions for Arab and non-Arab mothers for neonatal outcomes for Scenario 2 (one-category decrease in body mass index)

338x190mm (96 x 96 DPI)

# BMJ Open

## Effect of Pre-pregnancy maternal BMI on adverse pregnancy and neonatal outcomes: Results from a retrospective cohort study of a multi-ethnic population in Qatar

|                                 |                                                                                                                                                                                                                                                   |
|---------------------------------|---------------------------------------------------------------------------------------------------------------------------------------------------------------------------------------------------------------------------------------------------|
| Journal:                        | <i>BMJ Open</i>                                                                                                                                                                                                                                   |
| Manuscript ID                   | bmjopen-2019-029757.R1                                                                                                                                                                                                                            |
| Article Type:                   | Research                                                                                                                                                                                                                                          |
| Date Submitted by the Author:   | 18-Jun-2019                                                                                                                                                                                                                                       |
| Complete List of Authors:       | Shaukat, Shazia; Qatar University, Department of Public Health, College of Health Sciences, QU Health<br>Nur, Ula; Qatar University, Department of Public Health, College of Health Sciences, QU Health                                           |
| <b>Primary Subject Heading</b>: | Epidemiology                                                                                                                                                                                                                                      |
| Secondary Subject Heading:      | Public health, Health services research                                                                                                                                                                                                           |
| Keywords:                       | PUBLIC HEALTH, EPIDEMIOLOGY, HEALTH SERVICES ADMINISTRATION & MANAGEMENT, Health policy < HEALTH SERVICES ADMINISTRATION & MANAGEMENT, Quality in health care < HEALTH SERVICES ADMINISTRATION & MANAGEMENT, Community child health < PAEDIATRICS |
|                                 |                                                                                                                                                                                                                                                   |

SCHOLARONE™  
Manuscripts

1  
2  
3 **Effect of Pre-pregnancy maternal BMI on adverse pregnancy and neonatal**  
4 **outcomes: Results from a retrospective cohort study of a multi-ethnic**  
5 **population in Qatar**  
6  
7  
8  
9

10 Shazia Shaukat<sup>1</sup> and Ula Nur<sup>1</sup>  
11  
12

13 <sup>1</sup>Department of Public Health, College of Health Sciences, QU Health, Qatar University, Doha,  
14  
15 Qatar  
16  
17  
18  
19

20 Correspondance to: Ula Nur, Department of Public Health, College of Health Sciences, Qatar  
21  
22 University, Doha, Qatar  
23  
24

25 Ula.nur@qu.edu.qa  
26

27 *Key words: Maternal BMI, Pregnancy Outcomes, Nulliparous, Maternal Health*  
28

29 Word Count: 3051  
30  
31  
32  
33  
34  
35  
36  
37  
38  
39  
40  
41  
42  
43  
44  
45  
46  
47  
48  
49  
50  
51  
52  
53  
54  
55  
56  
57  
58  
59  
60

## Abstract

**Background** Given the small number of studies on the topic, we aimed to identify the impact of pre-pregnancy maternal body mass index (BMI) on adverse pregnancy outcomes (POs) in a low-risk, multiethnic population, and to calculate related population attributable fractions (PAFs).

**Methods** This retrospective cohort study included 1134 nulliparous women of 50 nationalities (classified into Arab and non-Arab ethnicity) in Qatar who had their first antenatal visit at a Primary Health Care Corporation (PHCC) facility in June 2016-March 2017 and their PO at a Hamad Medical Corporation (HMC) facility before 10 November 2017. We used multiple imputation to handle missing values and multivariate logistic regression to calculate adjusted odds ratios (aOR) for adverse POs in overweight and obese women.

**Results** Overweight and obese Arab women were at high risk for gestational diabetes mellitus (GDM) (aOR=2.38, 95%CI 1.51–3.84) and caesarean section (aOR=1.57, 95%CI 1.00–2.48). Obese non-Arab women were at high risk for preeclampsia (aOR=3.83, 95%CI 1.00–15.00). PAFs showed that 41.63% of preeclampsia, 17.36% of pregnancy-induced hypertension, 17.17% of large for gestational age, 15.89% of preterm deliveries, 14.75% of GDM, and 13.99% of caesarean sections could be avoided if all mothers had normal pre-pregnancy BMI. There were no major differences in PAFs by ethnicity.

**Conclusion** Adverse POs were attributable to maternal obesity. This suggests that, in contrast to existing PHCC protocol, overweight and obese women in Qatar should be targeted earlier in their pregnancy; preferably prior to getting pregnant. We observed ethnic differences in the risk of adverse POs.



## Article Summary

### Strengths and Limitations of this Study

- The study identifies overweight and obese nulliparous mothers who are at risk for maternal and neonatal complications using specific Body Mass Index cut offs applicable for a multi-ethnic diverse population.
- The study compares the risks across Arab and Non-Arab maternal ethnic groups
- The study uses multiple imputation techniques to handle missing BMI data
- The study used nationality as a surrogate for ethnicity which was valid in this sample given the dichotomous nature of the grouping used.
- The study did not consider potential confounders such as socioeconomic status since such data was not available in the dataset.

## Background

More than half of women of child bearing age in the developed world are either overweight or obese<sup>1</sup>, and the percentage of women who are obese at their first antenatal visit nearly doubled between 1990 and 2004<sup>2</sup>. Maternal obesity has been associated with infertility and can cause spontaneous pregnancy loss in early gestation<sup>3</sup>. Gestational diabetes<sup>4</sup>, preeclampsia<sup>5</sup>, gestational hypertension, depression, instrumental vaginal delivery, caesarean section delivery<sup>6</sup>, and surgical site infection have been associated with maternal obesity<sup>7</sup>. Maternal obesity can also impact neonatal outcomes, such as pre-term birth, large for gestational age babies, fetal defects, congenital anomalies, and perinatal death. Length of hospital stay was also reported as an adverse outcome of maternal obesity<sup>7</sup>.

Most published studies on the effect of obesity on pregnancy outcomes have focused on primarily homogenous regional populations that are not ethnically diverse<sup>8</sup>, but some researchers have shown that ethnic differences can have an impact on the association between obesity and adverse pregnancy outcomes<sup>9</sup>. This impact is particularly relevant for countries like Qatar, which has a diverse, multiethnic, transient population. The 2012 World Health Organization (WHO) STEPwise approach to Surveillance survey for Qatar showed that 68.3% of adult females were overweight and 43.2% were obese<sup>10</sup>, highlighting the significance of the maternal obesity problem in the country. The public health care system in Qatar is broken down into primary and secondary/tertiary care systems, with primary care administered by the Primary Health Care Corporation (PHCC), and secondary/tertiary care administered by the Hamad Medical Corporation (HMC). Both systems classify pregnancies as high-risk when the mother is obese Class III or higher (body mass index [BMI]  $\geq 40$  kg/m<sup>2</sup>), has a pre-existing medical condition, and/or obstetric complications, as per the guidelines of the Ministry of Health. Women with high-risk pregnancies

1  
2  
3 are directly referred to dedicated antenatal clinics of the HMC for specialized management.  
4  
5 However, women with a BMI  $<40$  kg/m<sup>2</sup>, but who are still overweight or obese, are cared for  
6  
7 through the PHCC; they are referred to the HMC only if they develop complications or for  
8  
9 delivery.  
10

11  
12 Population attributable fractions (PAFs) are used to identify the burden of risk factors for a  
13  
14 disease or condition in a given population<sup>11</sup>. Few studies have looked at PAFs of maternal obesity  
15  
16 <sup>12</sup>. Obesity is highly prevalent in Qatar, hence it is critical to study PAFs associated with obesity  
17  
18 in different ethnic groups to quantify the burden of disease that can be attributed to obesity, and  
19  
20 thereby help develop targeted management strategies. We aimed to identify the impact of pre-  
21  
22 pregnancy maternal BMI on adverse pregnancy outcomes in a low-risk, multi-ethnic population,  
23  
24 and to calculate related PAFs.  
25  
26  
27  
28  
29  
30  
31  
32  
33  
34  
35  
36  
37  
38  
39  
40  
41  
42  
43  
44  
45  
46  
47  
48  
49  
50  
51  
52  
53  
54

## Methods

The PHCC Database is linked to the Birth Register of Qatar; it includes information on all PHCC visits, and thus includes pre-pregnancy and maternal characteristics (e.g., age, nationality, pre-existing conditions), and pregnancy and neonatal outcomes. For this retrospective cohort study, we used the PHCC Database to identify all nulliparous women with singleton pregnancies who had their first antenatal visit at a PHCC facility between 1 June 2016 and 1 March 2017 and their pregnancy outcome at a HMC facility before 10 November 2017 (n=1245). We wanted to target women with low-risk pregnancies as defined by the Ministry of Health of Qatar. Therefore we excluded women with high-risk pregnancies, i.e., those with a pregnancy outcome prior to 24 weeks of gestation (n=8), those who were obese Class II and higher (BMI  $\geq 35$  kg/m<sup>2</sup>, n=80), or who were under the age of 18 at their first antenatal visit (n=23). Women who gave birth to babies with indeterminate sex (n=2), or who experienced still birth (n=3), fetal death (n=4), or neonatal death (n=1) were also excluded. Among the exclusions were 10 women who met more than one exclusion criterion; therefore, the final study sample consisted of 1,134 women. The anonymized data used in this study was provided after the approval of the study by the research section of the PHCC (reference number PHCC/RS/17/07/007) and the Institutional Review Board (IRB) of Qatar University (Reference **QU-IRB 846-E/17**).

## Patient and Public Involvement

This study involved secondary analysis of data collected by PHCC during its routine interactions with the patients. No additional patient or public contact was undertaken in this study.

### **Maternal ethnicity**

Included women were of 50 unique nationalities, and maternal ethnicity was categorized as Arab or non-Arab based on nationality. Women were designated as Arab if they were citizens of one of the 22 countries included in the list of League of Arab States (LAS)<sup>13</sup>. Our Arab study women came from 18 of these countries (Algeria, Bahrain, Egypt, Iraq, Jordan, Kuwait, Lebanon, Libya, Morocco, Oman, Palestine, Qatar, Saudi Arabia, Sudan, Syria, Tunis, United Arab Emirates, and Yemen). The LAS have a common language (Arabic) and share a number of cultural, social, and dietary habits which may put them at different lifestyle and obesity-related risks as compared to non-Arabs. Women of other nationalities were designated as non-Arabs.

### **Pre-pregnancy body mass index**

Pre-pregnancy BMI was calculated based on information recorded at the most recent pre-pregnancy visit available in the Primary Health Care Center Database. If this primary care visit was prior to 12 weeks from the date of the first antenatal visit, the BMI was treated as missing. Pre-pregnancy BMI was categorized as normal weight (BMI <25 kg/m<sup>2</sup>) overweight (BMI 25-29.99 kg/m<sup>2</sup>), and obese (BMI ≥30) based on standard WHO guidelines<sup>14</sup>. However, different BMI cut-offs were applied to Asians (n=405, overweight: BMI 23-27.5 kg/m<sup>2</sup>; obese: BMI ≥27.5 kg/m<sup>2</sup>), as recommended by the WHO expert consultation<sup>15</sup>. Sensitivity analyses, the results of which are not presented in this manuscript, showed that our application of different BMI cut-offs for Asians was valid, as using standard cut-offs underestimated the risk in that population.

### **Adverse pregnancy outcomes, adverse neonatal outcomes, and risk factors**

1  
2  
3 Investigated adverse pregnancy outcomes included GDM, pregnancy-induced hypertension (PIH),  
4 preeclampsia, preterm delivery, assisted vaginal delivery, and caesarean section. Investigated  
5 adverse neonatal outcomes included macrosomia, large for gestational age, small for gestational  
6 age, neonatal intensive care unit referrals, and Apgar score <7 at 1 minute. Risk factors considered  
7 included maternal age, maternal ethnicity, and pre-existing conditions such as diabetes mellitus  
8 type 1 or 2, hypertension, and thyroid conditions. Retrospective review of patient medical records  
9 including doctors' notes were used to identify pre-existing conditions and most adverse outcomes.  
10  
11  
12  
13  
14  
15  
16  
17  
18  
19  
20  
21  
22  
23  
24  
25  
26  
27  
28  
29  
30  
31  
32  
33  
34  
35  
36  
37  
38  
39  
40  
41  
42  
43  
44  
45  
46  
47  
48  
49  
50  
51  
52  
53  
54  
55  
56  
57  
58  
59  
60

Diagnosis of macrosomia, LGA and SGA was based off of the Weight Percentiles Calculator available from the WHO website<sup>16 17</sup>.

### Statistical analysis

Maternal characteristics and risk factors were tabulated using the observed data, and differences in the demographics across BMI categories were compared using Pearson's chi squared test. Thereafter, as pre-pregnancy BMI was not available for 101 (8.9%) of the study subjects, multiple imputation was performed to assign these values, with the underlying assumption that BMI values were missing at random<sup>18 19</sup>. Univariate and multivariate associations between maternal BMI category and adverse pregnancy and neonatal outcomes were assessed by logistic regression, using the imputed dataset.

Known and potential risk factors such as maternal age at first antenatal visit, pre-existing diabetes mellitus type 1 or 2, pre-existing hypertension, and pre-existing thyroid conditions were included as covariates in the final model. Maternal ethnicity was assessed as potential risk factor while computing adjusted odds ratios (ORs) for associations between BMI category and adverse pregnancy and neonatal outcomes. Subgroup analysis was conducted by computing crude and

1  
2  
3 adjusted ORs for adverse pregnancy and neonatal pregnancy outcomes separately for Arab and  
4  
5 Non-Arab mothers.  
6

7  
8 The adjusted ORs were used to compute PAFs of overweight and obesity for Arab and non-  
9  
10 Arab mothers. PAFs were used to estimate the proportion of adverse pregnancy and neonatal  
11  
12 outcomes that could be prevented if either one of two scenarios were true<sup>20</sup>: 1) if overweight and  
13  
14 obese women were all of normal weight before pregnancy; 2) if overweight and obese mothers  
15  
16 had a one-category drop in BMI before pregnancy (i.e., obese to overweight, and overweight to  
17  
18 normal weight). Scenario 0 was denoted the reference scenario, i.e., the current population as  
19  
20 represented by the data. These scenarios were also analysed by ethnicity.  
21  
22

23  
24 PAFs and corresponding 95% confidence intervals (CIs) were computed using a user-written  
25  
26 procedure (punaf) in the Stata software<sup>20</sup>. All analyses in this research report were performed using  
27  
28 the Stata 15<sup>21</sup> software package and Microsoft Excel. The significance level for this study was set  
29  
30 at 5%, so p-value  $\leq 0.05$  was considered statistically significant.  
31  
32  
33  
34  
35

## 36 **Results**

37  
38  
39 In our study sample, 86.33% of women were aged 18-30 years and 59.17% were of Arab ethnicity.  
40  
41 The study sample included women from 50 countries, representing an extremely diverse data set.  
42  
43 The most common risk factor among obese women was pre-existing thyroid conditions (5.22%).  
44  
45 Term deliveries (gestational age 37-41 weeks) accounted for 89.77% of births in the study sample  
46  
47 (Table 1a).  
48  
49

50 **==Insert Table 1(a) here ==**  
51  
52  
53  
54

1  
2  
3 GDM was the most common adverse pregnancy outcome and was observed in 35.89% of the  
4 study sample, followed by cesarean section (24.96%). Preeclampsia was observed in 3.44% of the  
5 study sample. The prevalence of GDM, cesarean section, and preeclampsia increased with  
6 increasing BMI category (Table 1b).  
7  
8  
9  
10  
11

12 == **Insert Table 1(b) here** ==  
13  
14  
15

16 Obese Arab mothers had statistically significant, higher odds of developing GDM (adjusted  
17 OR=2.41, 95% CI 1.51–3.84,  $p < 0.01$ ) when compared to normal-weight Arab mothers. Although  
18 the odds were higher for obese non-Arab mothers when compared to their normal-weight  
19 counterparts (adjusted OR=1.58, 95% CI 0.96–2.62,  $p=0.07$ ), these odds were not as high as those  
20 observed for Arab mothers, and the association was not statistically significant. Obese non-Arab  
21 women showed significantly higher odds (adjusted OR=3.83, 95% CI 0.98–15.00,  $p=0.05$ ) of  
22 developing preeclampsia when compared to normal-weight non-Arab women. Finally, the odds of  
23 caesarean section were significant among overweight Arab mothers, as compared to their normal-  
24 weight counterparts (adjusted OR=1.57, 95% CI 1.00–2.48,  $p=0.05$ ), but this association was not  
25 significant among obese Arab mothers or among obese non-Arab mothers when compared to their  
26 normal-weight counterparts (Table 2). Although higher odds were observed in obese (Figure 1) and  
27 overweight (Figure 2) mothers in both ethnic groups, p-values were not statistically significant for  
28 most adverse pregnancy or neonatal outcomes when compared to normal-weight counterparts.  
29  
30  
31  
32  
33  
34  
35  
36  
37  
38  
39  
40  
41  
42  
43  
44  
45

46 ==**Insert Table 2 here**==  
47

48 == **Insert Figure 1 here** ==  
49

50 == **Insert Figure 2 here** ==  
51  
52  
53  
54  
55  
56  
57  
58  
59  
60



### Population attributable fractions

For preeclampsia, a one-category reduction in BMI among Arab mothers corresponded to a PAF of 46.28% for obese women and 38.61% for overweight women (Figure 3). For PIH, a one-category drop in BMI for obese women corresponded to a PAF of 50.83%, meaning that 50.83% of PIH cases could be avoided if obese mothers reduced their BMI category to overweight (Figure 3). Corresponding PAFs for neonatal outcomes were 65.23% for macrosomia and 30.42% for Apgar score <7 at 1 minute. Some of the CIs and PAFs were negative (e.g., small for gestational age and assisted vaginal delivery), indicating a protective effect of obesity on these outcomes, which means that removing obesity could increase these risks (Tables 3 and 4).

== **Insert tables 3 and 4 here** ==

For GDM, a one-category reduction in BMI corresponded to a PAF of 24.72% and 24.58% for obese Arab and non-Arab mothers, respectively (Figure 3). The PAF for macrosomia if all women were of normal weight before pregnancy was 13.73% for non-Arab women, and 6.78% for Arab mothers (Figure 4). The PAFs for neonatal outcomes after a one-category reduction in BMI are not shown in the Figure 3 and Figure 4, as they are mostly negative due to the small number of cases.

=== **Insert Figures 3 and 4 here** ===

### Discussion

Our study confirms that there is an association between pre-pregnancy maternal BMI and adverse pregnancy and neonatal pregnancy outcomes in multi-ethnic populations, using adjusted ORs and

1  
2  
3 PAFs. Previous studies have shown similar strengths of association between overweight and  
4 obesity and GDM<sup>22</sup>, PIH<sup>22 23</sup>, preterm delivery<sup>12 24</sup>, assisted vaginal delivery<sup>22 25</sup>, caesarean  
5 section<sup>22 25</sup>, macrosomia<sup>12</sup>, large for gestational age<sup>24</sup> and small for gestation age<sup>24 25</sup>. However,  
6  
7 the present study found much higher ORs for preeclampsia in non-Arab mothers. This could be  
8 attributed to the large portion of Asian mothers in the non-Arab group, who have been reported to  
9 be susceptible to preeclampsia<sup>26</sup>.

10  
11  
12  
13  
14  
15  
16  
17 Our results confirm those of a recent study on nulliparous women in Qatar, which reported a  
18 higher incidence of GDM, caesarean section, and PIH in obese women<sup>27</sup>, whereas overweight  
19 women were reported to have higher caesarean section rates only<sup>27</sup>. However, the overall incidence  
20 of these outcomes was much lower than in our study sample (GDM: 15% vs 35.89% in our study  
21 sample; caesarean section: 16% vs 24.98%). These difference cannot be explained by the data  
22 alone, since the earlier study<sup>27</sup> was carried out in a tertiary care setting, whereas this research  
23 focused on primary care settings.

24  
25  
26  
27  
28  
29  
30  
31  
32  
33 The PAFs we report are much higher than those from some published studies<sup>12</sup>, due to the high  
34 prevalence of overweight and obesity (i.e., exposure) in our study sample. Preeclampsia stands  
35 out, as any reduction in BMI category yielded a substantial reduction in the burden of this  
36 condition. A one-category reduction in BMI showed a much higher possibility of disease reduction  
37 among obese women than among overweight women, whether they were Arab or non-Arab.  
38 However, caesarean section was an exception to this trend, and showed a lesser PAF for a one-  
39 category reduction in BMI among obese women than overweight women. This can be explained  
40 by the higher OR for caesarean section in overweight women as compared to obese women in both  
41 ethnic groups. It should be noted that a causal relationship between exposures and outcomes is  
42  
43  
44  
45  
46  
47  
48  
49  
50  
51  
52  
53  
54  
55  
56  
57  
58  
59  
60

1  
2  
3 generally assumed in PAF calculations. However, this relationship may not necessarily exist, and  
4  
5 PAFs should be considered accordingly.  
6

7  
8 Unlike other reports, the exposure variable in our study was not self-reported. We used  
9  
10 standard WHO recommended BMI cut-offs, except in the Asian population, in which Asian-  
11  
12 specific cut-offs were applied. Results of a sensitivity analysis indicated that the use of these Asian-  
13  
14 specific cut-offs is indeed clinically important in multiethnic populations. Indeed, Asian mothers  
15  
16 must be classified as overweight and obese using the WHO-recommended cut-offs for Asians,  
17  
18 otherwise high-risk patients may not be properly identified during antenatal care.  
19  
20

21  
22 Patient nationality was used as a surrogate for ethnicity, but it is common for people to change  
23  
24 their citizenship through immigration, which could have limited the strength of the conclusions of  
25  
26 this study. However, a detailed analysis of nationalities revealed that the number of patients  
27  
28 claiming citizenship to countries that are most likely targets for migrants was minimal  
29  
30 (Canadians=0, Australians=0, Americans=3, British=1, French=1). Therefore, the use of  
31  
32 nationality as a surrogate for ethnicity is reasonable and valid for this dataset.  
33  
34

35  
36 Other reports from Qatar showed higher rates of conditions such as diabetes mellitus and  
37  
38 cardiovascular diseases, which were not reflected in our study. These low rates may represent an  
39  
40 information bias which did not allow us to properly adjust for potential confounders. Data on  
41  
42 socioeconomic status and health center location were not available; hence it is not possible to  
43  
44 attribute missing values to these factors or to any other variables for which data was not  
45  
46 available.  
47  
48

49  
50 GDM, preeclampsia, and cesarean section were significantly associated with pre-pregnancy  
51  
52 BMI among our overweight and obese mothers, who are not generally considered to have at-risk  
53  
54 pregnancies by the health care system in Qatar. High prevalence of GDM in normal-weight  
55  
56

1  
2  
3 mothers (29.21%) indicates that BMI alone cannot explain the problem, which is instead related  
4  
5 to population norms and characteristics. High risk of preeclampsia in overweight and obese  
6  
7 mothers, especially among non-Arabs, indicates that early screening and management of  
8  
9 hypertensive disorders is needed for this group. This implies that clinical screening is indicated  
10  
11 for all mothers regardless of their pre-pregnancy BMI or ethnicity, preferably at the start of  
12  
13 pregnancy.  
14  
15

16  
17 The rate of cesarean section was very high in our study sample (25%), especially considering  
18  
19 that pregnancies in overweight and obese women are currently considered low-risk by the health  
20  
21 care system in Qatar. The odds of cesarean section were uncharacteristically high and similar in  
22  
23 overweight and obese mothers regardless of ethnicity. Clinical implications cannot be drawn  
24  
25 from these results without properly separating the cesarean sections by their indications  
26  
27 (medically necessary vs elective), which were not available in the study sample. Our findings of  
28  
29 an association between pre-pregnancy maternal BMI and cesarean section may not properly  
30  
31 represent the true nature of the outcome risk and exposure, and should therefore be interpreted  
32  
33 with caution.  
34  
35  
36

37  
38 As has been mentioned in above paragraphs, the retrospective cohort nature of this study  
39  
40 limited our ability to validate or verify the elements of the dataset and other potential  
41  
42 confounders through additional patient contact. The anonymity of the data by design made it  
43  
44 impossible to undertake such a follow up. The strength of our findings is therefore directly  
45  
46 related to the strength of the dataset used. The number of missing values in the exposure  
47  
48 variable, the pre-pregnancy BMI, meant that we were unable to ascertain a direct relationship for  
49  
50 those records. However, the impact of such was minimized by using the multiple imputation  
51  
52 techniques. The PAFs were computed using the punaf user written extension for Stata software  
53  
54  
55

1  
2  
3 and manual calculations for such cannot be undertaken due to the computational complexity of  
4  
5 the task.  
6

7  
8 Adverse pregnancy outcomes were attributable to maternal obesity for even low risk patients.  
9  
10 This suggests that, in contrast to the existing PHCC protocol which focuses only on high-risk  
11 pregnancies for intervention, overweight and obese women in Qatar should also be targeted earlier  
12 in their pregnancy, preferably prior to getting pregnant. We observed ethnic differences in the risk  
13 of adverse pregnancy outcomes. Planning and prevention approaches at the pre-conception stage  
14 are needed to raise awareness and reduce the burden of these adverse outcomes on the health care  
15 system. There is a need for an ecological approach that addresses societal, cultural, and personal  
16 influences by promoting good health at all levels. A top-down approach would work best to  
17 formulate public health policy to combat the issues raised. A combination of these public health  
18 interventions can help achieve the WHO Non-Communicable Disease Targets for the Global  
19 Action Plan by 2025.  
20  
21  
22  
23  
24  
25  
26  
27  
28  
29  
30  
31  
32  
33  
34  
35  
36  
37  
38  
39  
40  
41  
42  
43  
44  
45  
46  
47  
48  
49  
50  
51  
52  
53  
54  
55  
56  
57  
58  
59  
60

### Author affiliations:

<sup>1</sup>Department of Public Health, College of Health Sciences, QU Health, Qatar University, Doha, Qatar.

**Contributors** Conceptualization, S.S. and U.N.; methodology, S.S. and U.N.; software, S.S.; validation, S.S. and U.N.; formal analysis, S.S.; investigation, S.S. and U.N.; resources, S.S.; data curation, S.S.; writing—original draft preparation, S.S.; writing—review and editing, S.S. and U.N.; visualization, S.S. and U.N.; supervision, U.N. ; project administration, S.S.; funding acquisition, U.N.

**Funding** This work has been funded by Qatar university (grant no: QUST-1-CHS-2018-14) and Qatar National Library.

**Disclaimer** All authors have seen and approved the final version of the manuscript being submitted. They warrant that the article is the authors' original work, has not received prior publication and is not under consideration for publication elsewhere.

**Competing interests** None declared.

**Patient consent for publication** Not required.

**Ethics approval** Ethical approval was obtained from The Primary Health Care Corporation (Reference Number **PHCC/RS/17/07/007**) on October 3, 2017 and the Institutional Review Board (IRB) of Qatar University (Reference **QU-IRB 846-E/17**) on November 11, 2017.

**Data availability statement** The database analysed for this research include information on all antenatal visits to Primary Health Care Centres, between 1 June 2016 and 1 March 2017. Data can be obtained by request from the Primary Health Corporation in Qatar.

**Provenance and peer review** Not commissioned; externally peer reviewed.

**Open access** This is an open access article distributed in accordance with the Creative Commons Attribution Non Commercial (CC BY-NC 4.0) license, which permits others to distribute, remix, adapt, build upon this work non-commercially, and license their derivative works on different terms, provided the original work is properly cited, appropriate credit is given, any changes made indicated, and the use is non-commercial. See: <http://creativecommons.org/licenses/by-nc/4.0/>.

### References

1. Finucane MM, Stevens GA, Cowan MJ, et al. National, regional, and global trends in body-mass index since 1980: systematic analysis of health examination surveys and epidemiological studies with 960 country-years and 9·1 million participants. *The Lancet* 2011;377(9765):557-67.

- 1  
2  
3 2. Kanagalingam MG, Forouhi NG, Greer IA, et al. Changes in booking body mass index over a  
4 decade: retrospective analysis from a Glasgow Maternity Hospital. *BJOG: An International*  
5  
6 *Journal of Obstetrics & Gynaecology* 2005;112(10):1431-33. doi: 10.1111/j.1471-  
7  
8 0528.2005.00685.x  
9
- 10  
11  
12 3. Catalano PM, Shankar K. Obesity and pregnancy: mechanisms of short term and long term  
13  
14 adverse consequences for mother and child. *BMJ* 2017;356:j1.  
15
- 16  
17 4. Torloni M, Betrán A, Horta B, et al. Prepregnancy BMI and the risk of gestational diabetes: a  
18  
19 systematic review of the literature with meta-analysis. *Obesity Reviews* 2009;10(2):194-203.  
20  
21
- 22 5. O'Brien TE, Ray JG, Chan W-S. Maternal body mass index and the risk of preeclampsia: a  
23  
24 systematic overview. *Epidemiology* 2003;14(3):368-74.  
25
- 26  
27 6. Poobalan AS, Aucott LS, Gurung T, et al. Obesity as an independent risk factor for elective  
28  
29 and emergency caesarean delivery in nulliparous women – systematic review and meta-  
30  
31 analysis of cohort studies. *Obesity Reviews* 2009;10(1):28-35. doi: 10.1111/j.1467-  
32  
33 789X.2008.00537.x  
34
- 35  
36 7. Marchi J, Berg M, Dencker A, et al. Risks associated with obesity in pregnancy, for the  
37  
38 mother and baby: a systematic review of reviews. *Obesity Reviews* 2015;16(8):621-38. doi:  
39  
40 10.1111/obr.12288  
41
- 42  
43 8. Knight M, Kurinczuk JJ, Spark P, et al. Inequalities in maternal health: national cohort study  
44  
45 of ethnic variation in severe maternal morbidities. *BMJ* 2009;338:b542.  
46
- 47  
48 9. Makgoba M, Savvidou M, Steer P. An analysis of the interrelationship between maternal age,  
49  
50 body mass index and racial origin in the development of gestational diabetes mellitus.  
51  
52 *BJOG: An International Journal of Obstetrics & Gynaecology* 2012;119(3):276-82.  
53  
54

- 1  
2  
3 10. WHO. Qatar STEPS Survey 2012 - Fact Sheet: World Health Organization; 2012 [Available  
4  
5 from: [http://www.who.int/chp/steps/Qatar\\_FactSheet\\_2012.pdf](http://www.who.int/chp/steps/Qatar_FactSheet_2012.pdf)2017.  
6  
7
- 8 11. Greenland S, Drescher K. Maximum likelihood estimation of the attributable fraction from  
9  
10 logistic models. *Biometrics* 1993;865-72.  
11
- 12 12. Oteng-Ntim E, Kopeika J, Seed P, et al. Impact of obesity on pregnancy outcome in different  
13  
14 ethnic groups: calculating population attributable fractions. *PLoS One* 2013;8(1):e53749.  
15  
16
- 17 13. LAS. League of Arab States 2018 [Available from:  
18  
19 <http://www.lasportal.org/en/Pages/default.aspx> accessed March 08, 2018 2018.  
20  
21
- 22 14. WHO. Physical status: The use of and interpretation of anthropometry, Report of a WHO  
23  
24 Expert Committee. 1995  
25
- 26 15. WHO Expert Consultation. Appropriate body-mass index for Asian populations and its  
27  
28 implications for policy and intervention strategies. *Lancet* 2004;363(9403):157-63. doi:  
29  
30 10.1016/S0140-6736(03)15268-3  
31  
32
- 33 16. WHO. Weight Percentiles Calculator: World Health Organization; 2017 [Available from:  
34  
35 [https://www.who.int/reproductivehealth/topics/best\\_practices/weight\\_percentiles\\_calculator.](https://www.who.int/reproductivehealth/topics/best_practices/weight_percentiles_calculator.xls)  
36  
37 [xls](https://www.who.int/reproductivehealth/topics/best_practices/weight_percentiles_calculator.xls)2017.  
38  
39
- 40 17. Mikolajczyk RT, Zhang J, Betran AP, et al. A global reference for fetal-weight and  
41  
42 birthweight percentiles. *Lancet* 2011;377(9780):1855-61. doi: 10.1016/s0140-  
43  
44 6736(11)60364-4 [published Online First: 2011/05/31]  
45  
46
- 47 18. Sterne JAC, White IR, Carlin JB, et al. Multiple imputation for missing data in  
48  
49 epidemiological and clinical research: potential and pitfalls. *BMJ* 2009;338 doi:  
50  
51 10.1136/bmj.b2393  
52  
53  
54  
55



- 1  
2  
3 19. StataCorp LP. Stata data analysis and statistical Software. *Special Edition Release*  
4  
5 2017;15:733.  
6
- 7  
8 20. Newson RB. Attributable and unattributable risks and fractions and other scenario  
9  
10 comparisons. *Stata J* 2013;13(4):672-98.  
11
- 12 21. Stata. Data Analysis and Statistical Software | Stata Release 15 2017 [Available from:  
13  
14 <https://www.stata.com/>.  
15
- 16  
17 22. El-Chaar D, Finkelstein SA, Tu X, et al. The Impact of Increasing Obesity Class on  
18  
19 Obstetrical Outcomes. *Journal of Obstetrics and Gynaecology Canada* 2013;35(3):224-33.  
20  
21 doi: 10.1016/s1701-2163(15)30994-4  
22
- 23  
24 23. Metsälä J, Stach-Lempinen B, Gissler M, et al. Risk of Pregnancy Complications in Relation  
25  
26 to Maternal Prepregnancy Body Mass Index: Population-Based Study from Finland 2006-  
27  
28 102015.  
29
- 30  
31 24. El Rafei R, Abbas HA, Charafeddine L, et al. Association of Pre-Pregnancy Body Mass  
32  
33 Index and Gestational Weight Gain with Preterm Births and Fetal Size: an Observational  
34  
35 Study from Lebanon. *Paediatric and perinatal epidemiology* 2016;30(1):38-45.  
36
- 37  
38 25. Li C, Liu Y, Zhang W. Joint and Independent Associations of Gestational Weight Gain and  
39  
40 Pre-Pregnancy Body Mass Index with Outcomes of Pregnancy in Chinese Women: A  
41  
42 Retrospective Cohort Study. *PLoS ONE* 2015;10(8):e0136850. doi:  
43  
44 10.1371/journal.pone.0136850  
45
- 46  
47 26. Snowden JM, Mission JF, Marshall NE, et al. The Impact of maternal obesity and  
48  
49 race/ethnicity on perinatal outcomes: Independent and joint effects. *Obesity (Silver Spring)*  
50  
51 2016;24(7):1590-8. doi: 10.1002/oby.21532  
52  
53  
54  
55

- 1  
2  
3 27. Sharara HA, Rhaman LNA, Ummunnisa F, et al. Obese nulliparous women and the risk for  
4  
5 maternal and fetal complications. *Open Journal of Obstetrics and Gynecology* 2014;2014  
6  
7  
8  
9  
10  
11  
12  
13  
14  
15  
16  
17  
18  
19  
20  
21  
22  
23  
24  
25  
26  
27  
28  
29  
30  
31  
32  
33  
34  
35  
36  
37  
38  
39  
40  
41  
42  
43  
44  
45  
46  
47  
48  
49  
50  
51  
52  
53  
54  
55  
56  
57  
58  
59  
60

For peer review only

## List of figures

**Figure 1: Adjusted odds ratios and 95% confidence intervals for obese nulliparous mothers by ethnicity**

**Figure 2: Adjusted odds ratios and 95% confidence intervals for overweight nulliparous mothers by ethnicity**

**Figure 3: Population attributable fractions for Arab and non-Arab mothers for pregnancy outcomes for Scenario 1 (all to normal weight) and Scenario 2 (one-category decrease in body mass index)**

Abbreviations: GDM, C-section

**Figure 4 : Population attributable fractions for Arab and non-Arab mothers for neonatal outcomes for Scenario 2 (one-category decrease in body mass index)**

Abbreviations: NICU, neonatal intensive care unit; LGA, large for gestational age

## List of tables

**Table 1(a): Selected characteristics of the study sample by pre-pregnancy maternal body mass index (BMI) in Qatar (N=1134)**

**Table 1(b): Distribution of adverse pregnancy and neonatal outcomes by pre-pregnancy maternal body mass index (BMI) in Qatar (N=1134)**

**Table 2: Odds ratios (ORs) and 95% confidence intervals (CIs) of the association between adverse pregnancy and neonatal pregnancy outcomes and body mass index (BMI) category by ethnicity after multiple imputation (N=1134)**

**Table 3: Population attributable fractions (PAFs) % and 95% confidence intervals (CI) of adverse pregnancy and neonatal outcomes by pre-pregnancy body mass index among Arab mothers**

**Table 4: Population attributable fractions (PAFs) % and 95% confidence intervals (CI) of adverse pregnancy and neonatal outcomes by pre-pregnancy body mass index among non-Arab mothers**

Table 1(a): Selected characteristics of the study sample by pre-pregnancy maternal body mass index (BMI) in Qatar (N=1134)

|                                                   |                 | Pre-pregnancy BMI category |                    |               |                 | Total        | P-Value          |
|---------------------------------------------------|-----------------|----------------------------|--------------------|---------------|-----------------|--------------|------------------|
|                                                   |                 | Normal Weight (N=404)      | Overweight (N=399) | Obese (N=230) | Missing (N=101) | (N=1134)     |                  |
| <b>Maternal Age (years)</b>                       |                 |                            |                    |               |                 |              | <b>&lt;0.001</b> |
|                                                   | <b>18-24</b>    | 212(52.48%)                | 141(35.34%)        | 73(31.74%)    | 48(47.52%)      | 474(41.8%)   |                  |
|                                                   | <b>25-30</b>    | 157(38.86%)                | 195(48.87%)        | 114(49.57%)   | 39(38.61%)      | 505(44.53%)  |                  |
|                                                   | <b>31-44</b>    | 35(8.66%)                  | 63(15.79%)         | 43(18.7%)     | 14(13.86%)      | 155(13.67%)  |                  |
| <b>Maternal Ethnicity</b>                         |                 |                            |                    |               |                 |              | <b>0.005</b>     |
|                                                   | <b>Arab</b>     | 254(62.87%)                | 240(60.15%)        | 114(49.57%)   | 63(62.38%)      | 671(59.17%)  |                  |
|                                                   | <b>Non-Arab</b> | 150(37.13%)                | 159(39.85%)        | 116(50.43%)   | 38(37.62%)      | 463(40.83%)  |                  |
| <b>Pre-existing Hypertension</b>                  |                 |                            |                    |               |                 |              | 0.94             |
|                                                   | <b>Yes</b>      | 8(1.98%)                   | 10(2.51%)          | 4(1.74%)      | 2(1.98%)        | 24(2.12%)    |                  |
|                                                   | <b>No</b>       | 396(98.02%)                | 389(97.49%)        | 226(98.26%)   | 99(98.02%)      | 1110(97.88%) |                  |
| <b>Pre-existing Diabetes Mellitus Type 1 or 2</b> |                 |                            |                    |               |                 |              | 0.67             |
|                                                   | <b>Yes</b>      | 5(1.24%)                   | 4(1%)              | 4(1.74%)      | 0(0%)           | 13(1.15%)    |                  |
|                                                   | <b>No</b>       | 399(98.76%)                | 395(99%)           | 226(98.26%)   | 101(100%)       | 1121(98.85%) |                  |
| <b>Pre-existing Thyroid Condition</b>             |                 |                            |                    |               |                 |              | 0.22             |
|                                                   | <b>Yes</b>      | 18(4.46%)                  | 10(2.51%)          | 12(5.22%)     | 2(1.98%)        | 42(3.7%)     |                  |
|                                                   | <b>No</b>       | 386(95.54%)                | 389(97.49%)        | 218(94.78%)   | 99(98.02%)      | 1092(96.3%)  |                  |
| <b>Gestational Age at Delivery (weeks)</b>        |                 |                            |                    |               |                 |              | 0.60             |
|                                                   | <b>&lt;37</b>   | 32(7.92%)                  | 40(10.03%)         | 28(12.17%)    | 10(9.9%)        | 110(9.7%)    |                  |
|                                                   | <b>37-41+6d</b> | 370(91.58%)                | 357(89.47%)        | 200(86.96%)   | 91(90.1%)       | 1018(89.77%) |                  |
|                                                   | <b>≥42</b>      | 2(0.5%)                    | 2(0.5%)            | 2(0.87%)      | 0(0%)           | 6(0.53%)     |                  |

Values shown as Number(%)

Chi<sup>2</sup> test was used to determine differences across the BMI categories

Fishers Exact test was used when cell count was <5

Table 1(b): Distribution of adverse pregnancy and neonatal outcomes by pre-pregnancy maternal body mass index (BMI) in Qatar (N=1134)

|                                       | Pre-pregnancy BMI category  |                       |                  |                    | Total<br>(N=1134) | P-Value          |
|---------------------------------------|-----------------------------|-----------------------|------------------|--------------------|-------------------|------------------|
|                                       | Normal<br>Weight<br>(N=404) | Overweight<br>(N=399) | Obese<br>(N=230) | Missing<br>(N=101) |                   |                  |
| <b>Pregnancy Outcomes</b>             |                             |                       |                  |                    |                   |                  |
| <b>Gestational Diabetes Mellitus</b>  | 118(29.21%)                 | 140(35.09%)           | 108(46.96%)      | 41(40.59%)         | 407(35.89%)       | <b>&lt;0.001</b> |
| <b>Pregnancy-Induced Hypertension</b> | 14(3.47%)                   | 14(3.51%)             | 17(7.39%)        | 1(0.99%)           | 46(4.06%)         | <b>0.038</b>     |
| <b>Preeclampsia</b>                   | 8(1.98%)                    | 14(3.51%)             | 15(6.52%)        | 2(1.98%)           | 39(3.44%)         | <b>0.013</b>     |
| <b>Preterm Delivery</b>               | 32(7.92%)                   | 40(10.03%)            | 28(12.17%)       | 8(7.92%)           | 108(9.52%)        | 0.21             |
| <b>Assisted Vaginal Delivery</b>      | 66(16.34%)                  | 62(15.54%)            | 40(17.39%)       | 11(10.89%)         | 179(15.78%)       | 0.831            |
| <b>Cesarean Section</b>               | 80(19.8%)                   | 107(26.82%)           | 69(30%)          | 27(26.73%)         | 283(24.96%)       | <b>0.008</b>     |
| <b>Neonatal Outcomes</b>              |                             |                       |                  |                    |                   |                  |
| <b>Macrosomia</b>                     | 11(2.72%)                   | 8(2.01%)              | 13(5.65%)        | 1(0.99%)           | 33(2.91%)         | <b>0.034</b>     |
| <b>Large for Gestational Age</b>      | 25(6.19%)                   | 31(7.77%)             | 23(10%)          | 7(6.93%)           | 86(7.58%)         | 0.22             |
| <b>Small for Gestational Age</b>      | 65(16.09%)                  | 55(13.78%)            | 32(13.91%)       | 22(21.78%)         | 174(15.34%)       | 0.606            |
| <b>NICU referral</b>                  | 36(8.91%)                   | 46(11.53%)            | 22(9.57%)        | 10(9.9%)           | 114(10.05%)       | 0.449            |
| <b>Apgar Score &lt;7 at 1 min,</b>    | 19(4.7%)                    | 17(4.26%)             | 14(6.09%)        | 4(3.96%)           | 54(4.76%)         | 0.582            |

Values shown as Number(%)

Chi<sup>2</sup> test was used to determine differences across the BMI categories

Abbreviations: NICU, neonatal intensive care unit.

Table 2: Odds ratios (ORs) and 95% confidence intervals (CIs) of the association between adverse pregnancy and neonatal pregnancy outcomes and body mass index (BMI) category by ethnicity after multiple imputation (N=1134)

|                                       | Arabs      |                      |         | Non-Arabs  |                      |         |
|---------------------------------------|------------|----------------------|---------|------------|----------------------|---------|
|                                       | Prevalence | Adjusted OR (95% CI) | P-Value | Prevalence | Adjusted OR (95% CI) | P-Value |
| <b>Pregnancy Outcomes</b>             |            |                      |         |            |                      |         |
| <b>Gestational Diabetes Mellitus</b>  |            |                      |         |            |                      |         |
| Overweight                            | 92(34.98%) | 1.24 (0.84 – 1.82)   | 0.28    | 64(36.99%) | 1.23(0.76 – 2.00)    | 0.40    |
| Obese                                 | 66(51.97%) | 2.38 (1.51 – 3.84)   | <0.01   | 54(43.2%)  | 1.60 (0.97 – 2.65)   | 0.07    |
| <b>Pregnancy-Induced Hypertension</b> |            |                      |         |            |                      |         |
| Overweight                            | 11(4.18%)  | 1.66 (0.63 – 4.38)   | 0.31    | 3(1.73%)   | 0.41 (0.11 – 1.61)   | 0.20    |
| Obese                                 | 4(3.15%)   | 1.21 (0.34 – 4.31)   | 0.76    | 13(10.4%)  | 2.41 (0.93 – 6.327)  | 0.07    |
| <b>Preeclampsia</b>                   |            |                      |         |            |                      |         |
| Overweight                            | 6(2.28%)   | 1.11 (0.33 – 3.71)   | 0.86    | 9(5.2%)    | 2.56 (0.66 – 9.97)   | 0.18    |
| Obese                                 | 7(5.51%)   | 2.64 (0.81 – 8.65)   | 0.11    | 8(6.4%)    | 3.83 (0.98 – 15.00)  | 0.05    |
| <b>Preterm Delivery</b>               |            |                      |         |            |                      |         |
| Overweight                            | 26(9.89%)  | 1.26 (0.66 – 2.41)   | 0.48    | 18(10.4%)  | 1.22 (0.57 – 2.61)   | 0.61    |
| Obese                                 | 14(11.02%) | 1.35 (0.63 – 2.91)   | 0.45    | 17(13.6%)  | 1.69 (0.78 – 3.68)   | 0.18    |
| <b>Assisted Vaginal Delivery</b>      |            |                      |         |            |                      |         |
| Overweight                            | 38(14.45%) | 0.94 (0.57 – 1.55)   | 0.82    | 28(16.18%) | 0.87 (0.48 – 1.58)   | 0.65    |
| Obese                                 | 20(15.75%) | 1.01 (0.55 – 1.86)   | 0.97    | 22(17.6%)  | 0.97 (0.52 – 1.81)   | 0.93    |
| <b>Cesarean Section</b>               |            |                      |         |            |                      |         |
| Overweight                            | 66(25.1%)  | 1.57 (1.00 – 2.48)   | 0.05    | 51(29.48%) | 1.05 (0.64 – 1.74)   | 0.83    |
| Obese                                 | 32(25.2%)  | 1.46 (0.83 – 2.53)   | 0.20    | 45(36%)    | 1.43 (0.84 – 2.44)   | 0.19    |
| <b>Neonatal Outcomes</b>              |            |                      |         |            |                      |         |
| <b>Macrosomia</b>                     |            |                      |         |            |                      |         |
| Overweight                            | 7(2.66%)   | 0.86 (0.30 – 2.42)   | 0.77    | 1(0.58%)   | 0.37 (0.04 – 3.39)   | 0.38    |
| Obese                                 | 6(4.72%)   | 1.48 (0.49 – 4.48)   | 0.49    | 7(5.6%)    | 3.05 (0.77 – 12.06)  | 0.11    |
| <b>Large for Gestational Age</b>      |            |                      |         |            |                      |         |
| Overweight                            | 19(7.22%)  | 1.06 (0.53 – 2.14)   | 0.87    | 15(8.67%)  | 1.52 (0.61 – 3.79)   | 0.37    |
| Obese                                 | 13(10.24%) | 1.46 (0.66 – 3.20)   | 0.35    | 12(9.6%)   | 1.75 (0.70 – 4.41)   | 0.23    |
| <b>Small for Gestational Age</b>      |            |                      |         |            |                      |         |
| Overweight                            | 34(12.93%) | 0.84 (0.49 – 1.43)   | 0.52    | 30(17.34%) | 0.93 (0.52 – 1.67)   | 0.82    |
| Obese                                 | 17(13.39%) | 0.90 (0.44 – 1.82)   | 0.77    | 19(15.2%)  | 0.84 (0.44 – 1.60)   | 0.59    |
| <b>NICU referral</b>                  |            |                      |         |            |                      |         |
| Overweight                            | 26(9.89%)  | 1.15 (0.63 – 2.11)   | 0.65    | 23(13.29%) | 1.30 (0.64 – 2.64)   | 0.46    |
| Obese                                 | 8(6.3%)    | 0.64 (0.26 – 1.55)   | 0.32    | 17(13.6%)  | 1.30 (0.61 – 2.77)   | 0.49    |
| <b>Apgar Score &lt;7 at 1 min.</b>    |            |                      |         |            |                      |         |
| Overweight                            | 13(4.94%)  | 1.24 (0.53 – 2.92)   | 0.63    | 6(3.47%)   | 0.59 (0.19 – 1.80)   | 0.47    |
| Obese                                 | 8(6.3%)    | 1.72 (0.66 – 4.46)   | 0.27    | 6(4.8%)    | 0.86 (0.30 – 2.48)   | 0.50    |

For each ethnic group, normal weight was considered the reference category (OR = 1) for calculating ORs.

All outcomes were adjusted for maternal age at first antenatal visit. In addition: pre-eclampsia for pre-existing diabetes, and pre-existing hypertension, preterm delivery for pre-existing comorbid conditions, assisted vaginal delivery for pre-existing comorbid conditions, caesarean section for pre-existing comorbid conditions, macrosomia for pre-existing diabetes, large for gestational age for pre-existing diabetes, and small for gestational age was adjusted for pre-existing diabetes and pre-existing hypertension. NICU, neonatal intensive care unit.

Table 3: Population attributable fractions (PAFs) % and 95% confidence intervals (CI) of adverse pregnancy and neonatal outcomes by pre-pregnancy body mass index among Arab mothers

|                                       | All to Normal Weight<br>(Scenario 1) | Obese to Overweight<br>(Scenario 2) | Overweight to Normal<br>(Scenario 2) |
|---------------------------------------|--------------------------------------|-------------------------------------|--------------------------------------|
| <b>Pregnancy Outcomes</b>             |                                      |                                     |                                      |
| <b>Gestational Diabetes</b>           | 13.64 (2.81 to 23.27)                | 24.72 (8.88 to 37.8)                | 12.52 (-7.28 to 28.66)               |
| <b>Pregnancy-Induced Hypertension</b> | 14.62 (-28.68 to 43.35)              | <b>50.83 (1.46 to 75.46)</b>        | -3.46 (-116.78 to 50.63)             |
| <b>Preeclampsia</b>                   | <b>40.26 (-8.34 to 67.06)</b>        | <b>46.28 (-8.98 to 73.52)</b>       | <b>38.61 (-45.72 to 74.14)</b>       |
| <b>Preterm Delivery</b>               | 15.04 (-11.09 to 35.03)              | 16.02 (-33.05 to 46.99)             | 18.14 (-28.65 to 47.91)              |
| <b>Assisted Vaginal Delivery</b>      | -3.11 (-22.13 to 12.95)              | 8.23 (-32.19 to 36.29)              | -8.5 (-50.1 to 21.57)                |
| <b>Cesarean Section</b>               | 14.09 (-0.9 to 26.86)                | 7.14 (-21.13 to 28.81)              | 19.24 (-5.27 to 38.03)               |
| <b>Neonatal Outcomes</b>              |                                      |                                     |                                      |
| <b>Macrosomia</b>                     | 6.78 (-47.09 to 40.91)               | <b>65.23 (17.74 to 85.31)</b>       | -44.54 (-257.57 to 41.58)            |
| <b>Large for Gestational Age</b>      | 16.03 (-13.93 to 38.11)              | 22.26 (-29.92 to 53.48)             | 17.23 (-38.3 to 50.46)               |
| <b>Small for Gestational Age</b>      | -7.96 (-27.51 to 8.59)               | -1.19 (-53.4 to 33.24)              | -14.47 (-61.48 to 18.85)             |
| <b>NICU referral</b>                  | 7.91 (-18.08 to 28.18)               | -25.28 (-104.33 to 23.18)           | 18.37 (-24.71 to 46.57)              |
| <b>Apgar Score &lt;7 at 1 min.</b>    | 1.67 (-37.59 to 29.73)               | <b>30.42 (-38.63 to 65.08)</b>      | -10.89 (-111.84 to 41.95)            |

Abbreviations: NICU, neonatal intensive care unit



Table 4: Population attributable fractions (PAFs) % and 95% confidence intervals (CI) of adverse pregnancy and neonatal outcomes by pre-pregnancy body mass index among non-Arab mothers

|                                        | All to Normal Weight          | Obese to Overweight            | Overweight to Normal           |
|----------------------------------------|-------------------------------|--------------------------------|--------------------------------|
| <b>Pregnancy Outcomes</b>              |                               |                                |                                |
| <b>Gestational Diabetes</b>            | 16.2 (4.79 to 26.23)          | 24.58 (8.6 to 37.77)           | 12.18 (-7.12 to 28)            |
| <b>Pregnancy -Induced Hypertension</b> | 19.98 (-26.05 to 49.2)        | <b>50.24 (1.25 to 74.93)</b>   | -3.41 (-114.55 to 50.16)       |
| <b>Preeclampsia</b>                    | <b>42.92 (-5.47 to 69.11)</b> | <b>46.42 (-9.27 to 73.73)</b>  | <b>37.79 (-44.56 to 73.23)</b> |
| <b>Preterm Delivery</b>                | 16.89 (-10.67 to 37.59)       | 15.8 (-32.54 to 46.51)         | 17.86 (-28.14 to 47.34)        |
| <b>Assisted Delivery</b>               | -2.81 (-23.22 to 14.22)       | 8.14 (-31.83 to 36)            | -8.27 (-48.48 to 21.06)        |
| <b>Cesarean Section</b>                | 13.89 (-0.47 to 26.2)         | 6.48 (-18.95 to 26.47)         | 17.19 (-4.73 to 34.53)         |
| <b>Neonatal Outcomes</b>               |                               |                                |                                |
| <b>Macrosomia</b>                      | 13.73 (-46.3 to 49.13)        | <b>65.86 (17.93 to 85.8)</b>   | -45.01 (-261.54 to 41.84)      |
| <b>Large for Gestational Age</b>       | 18.86 (-13.59 to 42.04)       | 22.44 (-30.35 to 53.85)        | 17.29 (-38.52 to 50.62)        |
| <b>Small for Gestational Age</b>       | -8.73 (-30.31 to 9.27)        | -1.13 (-50.1 to 31.86)         | -13.69 (-57.58 to 17.98)       |
| <b>NICU referral</b>                   | 7.09 (-20.53 to 28.37)        | -24.49 (-100.23 to 22.59)      | 17.79 (-23.81 to 45.41)        |
| <b>Apgar Score &lt; 7</b>              | 4.25 (-40 to 34.51)           | <b>30.53 (-38.95 to 65.27)</b> | -10.93 (-112.38 to 42.06)      |

Abbreviations: NICU, neonatal intensive care unit

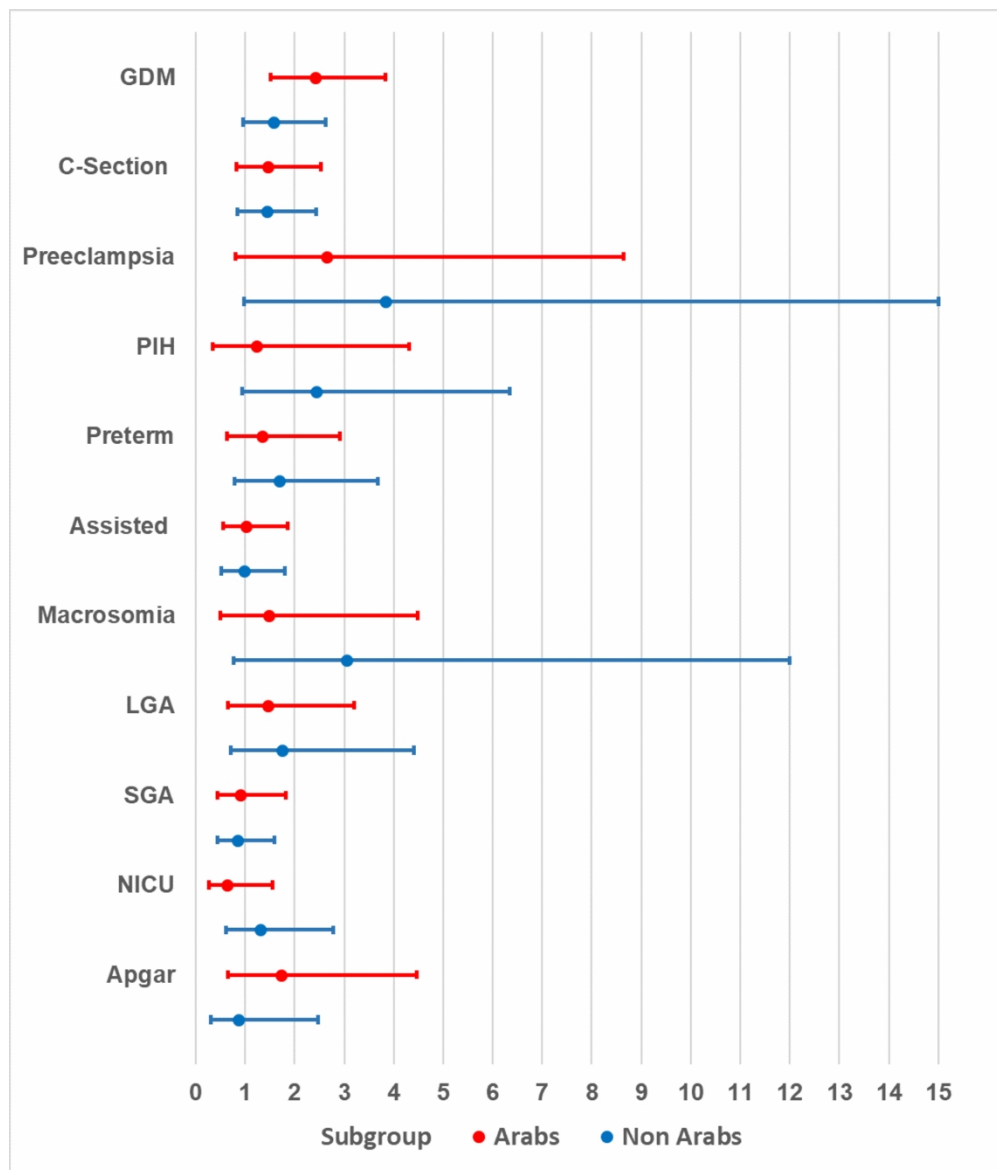

1  
2  
3  
4  
5  
6  
7  
8  
9  
10  
11  
12  
13  
14  
15  
16  
17  
18  
19  
20  
21  
22  
23  
24  
25  
26  
27  
28  
29  
30  
31  
32  
33  
34  
35  
36  
37  
38  
39  
40  
41  
42  
43  
44  
45  
46  
47  
48  
49  
50  
51  
52  
53  
54  
55  
56  
57  
58  
59  
60

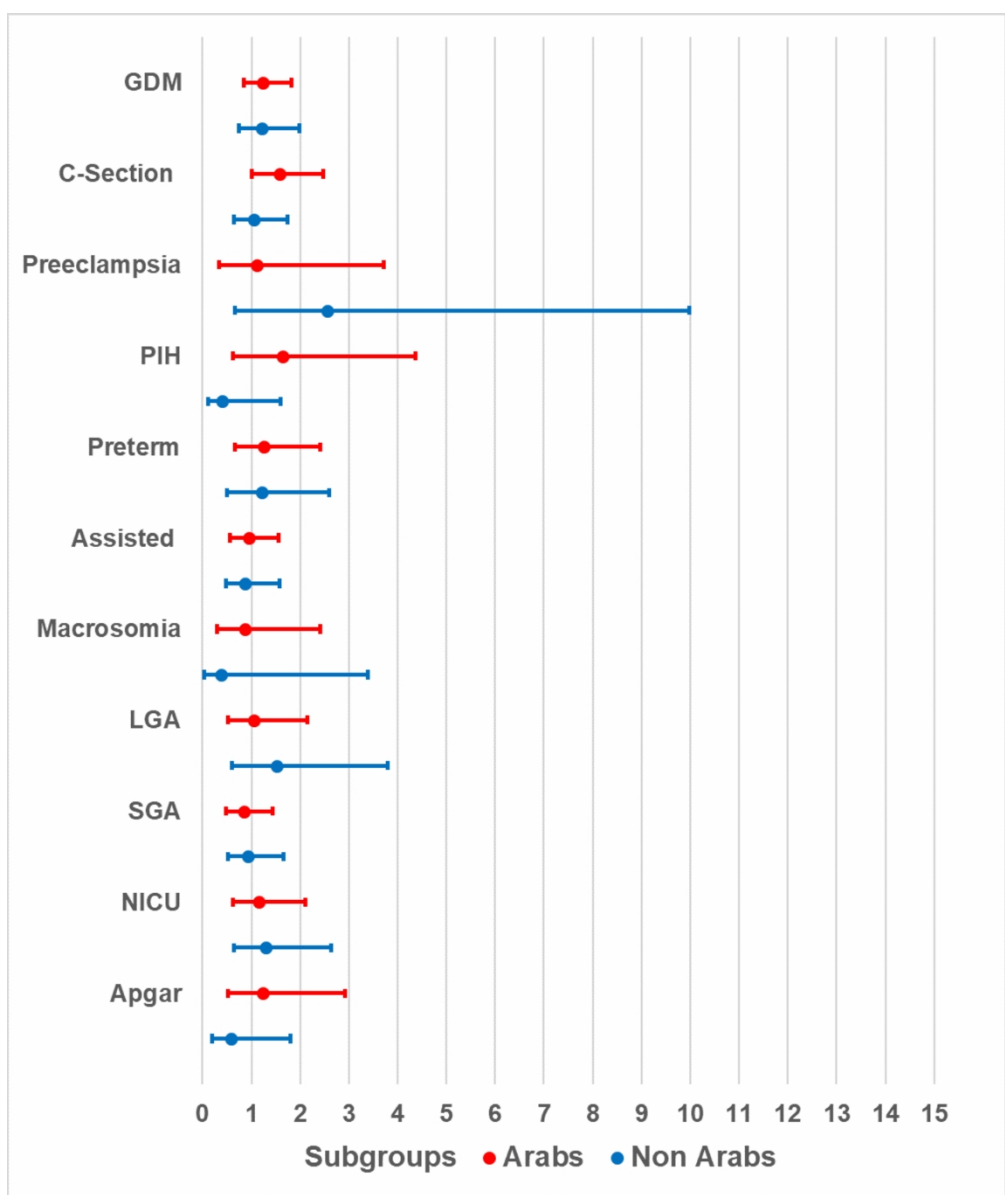

1  
2  
3  
4  
5  
6  
7  
8  
9  
10  
11  
12  
13  
14  
15  
16  
17  
18  
19  
20  
21  
22  
23  
24  
25  
26  
27  
28  
29  
30  
31  
32  
33  
34  
35  
36  
37  
38  
39  
40  
41  
42  
43  
44  
45  
46  
47  
48  
49  
50  
51  
52  
53  
54  
55  
56  
57  
58  
59  
60

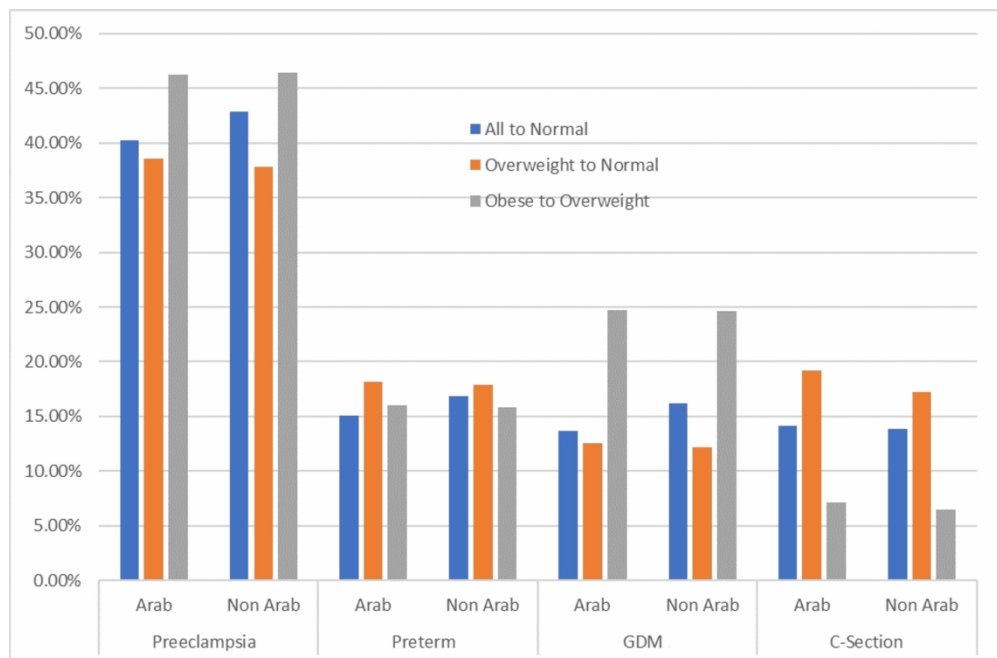

1  
2  
3  
4  
5  
6  
7  
8  
9  
10  
11  
12  
13  
14  
15  
16  
17  
18  
19  
20  
21  
22  
23  
24  
25  
26  
27  
28  
29  
30  
31  
32  
33  
34  
35  
36  
37  
38  
39  
40  
41  
42  
43  
44  
45  
46  
47  
48  
49  
50  
51  
52  
53  
54  
55  
56  
57  
58  
59  
60

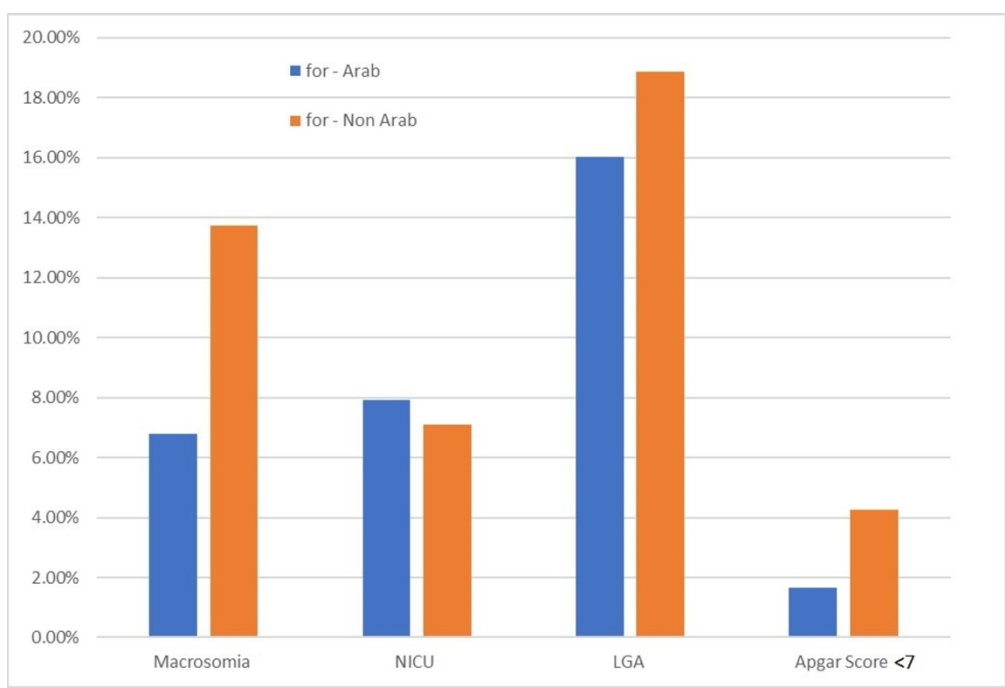

STROBE Statement—Checklist of items that should be included in reports of *cohort studies*

|                              | Item No | Recommendation                                                                                                                                                                                                                                                                                                                      |
|------------------------------|---------|-------------------------------------------------------------------------------------------------------------------------------------------------------------------------------------------------------------------------------------------------------------------------------------------------------------------------------------|
| <b>Title and abstract</b>    | 1       | (a) Indicate the study's design with a commonly used term in the title or the abstract<br><i>Done, title page</i>                                                                                                                                                                                                                   |
|                              |         | (b) Provide in the abstract an informative and balanced summary of what was done and what was found<br><i>Done, page 2</i>                                                                                                                                                                                                          |
| <b>Introduction</b>          |         |                                                                                                                                                                                                                                                                                                                                     |
| Background/rationale         | 2       | Explain the scientific background and rationale for the investigation being reported<br><i>Done, page 4</i>                                                                                                                                                                                                                         |
| Objectives                   | 3       | State specific objectives, including any pre-specified hypotheses<br><i>Done, page 4</i>                                                                                                                                                                                                                                            |
| <b>Methods</b>               |         |                                                                                                                                                                                                                                                                                                                                     |
| Study design                 | 4       | Present key elements of study design early in the paper<br><i>Done, Abstract and page 6</i>                                                                                                                                                                                                                                         |
| Setting                      | 5       | Describe the setting, locations, and relevant dates, including periods of recruitment, exposure, follow-up, and data collection<br><i>Done, methods section, page 6</i>                                                                                                                                                             |
| Participants                 | 6       | (a) Give the eligibility criteria, and the sources and methods of selection of participants. Describe methods of follow-up<br><i>Done, methods section, page 6</i>                                                                                                                                                                  |
|                              |         | (b) For matched studies, give matching criteria and number of exposed and unexposed                                                                                                                                                                                                                                                 |
| Variables                    | 7       | Clearly define all outcomes, exposures, predictors, potential confounders, and effect modifiers. Give diagnostic criteria, if applicable<br><i>Done, methods section, page 7</i>                                                                                                                                                    |
| Data sources/<br>measurement | 8*      | For each variable of interest, give sources of data and details of methods of assessment (measurement). Describe comparability of assessment methods if there is more than one group<br><i>Data source and methods of assessment of exposure and outcomes are presented in in the methods section page 6</i>                        |
| Bias                         | 9       | Describe any efforts to address potential sources of bias<br><i>Potential sources of bias are explained on page 13</i>                                                                                                                                                                                                              |
| Study size                   | 10      | Explain how the study size was arrived at<br><i>All nulliparous women with singleton pregnancies who had their first antenatal visit at a PHCC facility between 1 June 2016 and 1 March 2017 and their pregnancy outcome at a HMC facility before 10 November 2017 (n=1245) were included in this study, methods section page 6</i> |
| Quantitative variables       | 11      | Explain how quantitative variables were handled in the analyses. If applicable, describe which groupings were chosen and why<br><i>All quantitative variables included in analysis with details of variables that have been categorized are presented in methods section page 6-8</i>                                               |
| Statistical methods          | 12      | (a) Describe all statistical methods, including those used to control for confounding<br><i>Done, all statistical methods to control for confounding on page 8-9</i>                                                                                                                                                                |
|                              |         | (b) Describe any methods used to examine subgroups and interactions<br><i>Done, multivariable logistic regression analysis and population attributable fractions were used to adjust for overweight and obesity for Arab and non-Arab mothers , pages 7-8</i>                                                                       |

|    |                          |                                                                                           |
|----|--------------------------|-------------------------------------------------------------------------------------------|
| 1  |                          | (c) Explain how missing data were addressed                                               |
| 2  |                          | Done, multiple imputation was used to handle missing data, page 8                         |
| 3  |                          |                                                                                           |
| 4  |                          | (d) If applicable, explain how loss to follow-up was addressed                            |
| 5  |                          | Not applicable                                                                            |
| 6  |                          |                                                                                           |
| 7  |                          | (e) Describe any sensitivity analyses                                                     |
| 8  |                          | Sensitivity analysis was not applied                                                      |
| 9  |                          |                                                                                           |
| 9  | <b>Results</b>           |                                                                                           |
| 10 | Participants             | 13*                                                                                       |
| 11 |                          | (a) Report numbers of individuals at each stage of study—eg numbers potentially           |
| 12 |                          | eligible, examined for eligibility, confirmed eligible, included in the study,            |
| 13 |                          | completing follow-up, and analysed                                                        |
| 14 |                          | Done, methods section page 5                                                              |
| 15 |                          | (b) Give reasons for non-participation at each stage                                      |
| 16 |                          | Done, page 5                                                                              |
| 17 |                          | (c) Consider use of a flow diagram                                                        |
| 18 |                          | Flow diagram was not needed                                                               |
| 19 |                          |                                                                                           |
| 20 | Descriptive data         | 14*                                                                                       |
| 21 |                          | (a) Give characteristics of study participants (eg demographic, clinical, social) and     |
| 22 |                          | information on exposures and potential confounders                                        |
| 23 |                          | Done, table 1 and results section page 9-10                                               |
| 24 |                          | (b) Indicate number of participants with missing data for each variable of interest       |
| 25 |                          | Done, table 1, results page 9                                                             |
| 26 |                          | (c) Summarise follow-up time (eg, average and total amount)                               |
| 27 |                          | Not applicable                                                                            |
| 28 |                          |                                                                                           |
| 29 | Outcome data             | 15*                                                                                       |
| 30 |                          | Report numbers of outcome events or summary measures over time                            |
| 31 |                          | Not applicable                                                                            |
| 32 | Main results             | 16                                                                                        |
| 33 |                          | (a) Give unadjusted estimates and, if applicable, confounder-adjusted estimates and       |
| 34 |                          | their precision (eg, 95% confidence interval). Make clear which confounders were          |
| 35 |                          | adjusted for and why they were included                                                   |
| 36 |                          | Done, tables 2,3, 4, and results section, pages 10-11                                     |
| 37 |                          | (b) Report category boundaries when continuous variables were categorized                 |
| 38 |                          | Done, page 7                                                                              |
| 39 |                          | (c) If relevant, consider translating estimates of relative risk into absolute risk for a |
| 40 |                          | meaningful time period                                                                    |
| 41 |                          | Not applicable                                                                            |
| 42 |                          |                                                                                           |
| 43 | Other analyses           | 17                                                                                        |
| 44 |                          | Report other analyses done—eg analyses of subgroups and interactions, and                 |
| 45 |                          | sensitivity analyses                                                                      |
| 46 |                          | Done, pages 9-10                                                                          |
| 47 |                          |                                                                                           |
| 47 | <b>Discussion</b>        |                                                                                           |
| 48 | Key results              | 18                                                                                        |
| 49 |                          | Summarise key results with reference to study objectives                                  |
| 50 |                          | Done, 12-15                                                                               |
| 51 | Limitations              | 19                                                                                        |
| 52 |                          | Discuss limitations of the study, taking into account sources of potential bias or        |
| 53 |                          | imprecision. Discuss both direction and magnitude of any potential bias                   |
| 54 |                          | Done, page 13-14                                                                          |
| 55 | Interpretation           | 20                                                                                        |
| 56 |                          | Give a cautious overall interpretation of results considering objectives, limitations,    |
| 57 |                          | multiplicity of analyses, results from similar studies, and other relevant evidence       |
| 58 |                          | Done, pages 14-15                                                                         |
| 59 | Generalisability         | 21                                                                                        |
| 60 |                          | Discuss the generalisability (external validity) of the study results                     |
|    |                          | Done, page 15                                                                             |
|    | <b>Other information</b> |                                                                                           |

---

|         |    |                                                                                                                                                               |
|---------|----|---------------------------------------------------------------------------------------------------------------------------------------------------------------|
| Funding | 22 | Give the source of funding and the role of the funders for the present study and, if applicable, for the original study on which the present article is based |
|---------|----|---------------------------------------------------------------------------------------------------------------------------------------------------------------|

---

Done, funding statement is presented after discussion

---

\*Give information separately for exposed and unexposed groups.

**Note:** An Explanation and Elaboration article discusses each checklist item and gives methodological background and published examples of transparent reporting. The STROBE checklist is best used in conjunction with this article (freely available on the Web sites of PLoS Medicine at <http://www.plosmedicine.org/>, Annals of Internal Medicine at <http://www.annals.org/>, and Epidemiology at <http://www.epidem.com/>). Information on the STROBE Initiative is available at <http://www.strobe-statement.org>.

For peer review only



# BMJ Open

## Effect of Pre-pregnancy maternal BMI on adverse pregnancy and neonatal outcomes: Results from a retrospective cohort study of a multi-ethnic population in Qatar

|                                 |                                                                                                                                                                                                                                                   |
|---------------------------------|---------------------------------------------------------------------------------------------------------------------------------------------------------------------------------------------------------------------------------------------------|
| Journal:                        | <i>BMJ Open</i>                                                                                                                                                                                                                                   |
| Manuscript ID                   | bmjopen-2019-029757.R2                                                                                                                                                                                                                            |
| Article Type:                   | Research                                                                                                                                                                                                                                          |
| Date Submitted by the Author:   | 14-Aug-2019                                                                                                                                                                                                                                       |
| Complete List of Authors:       | Shaukat, Shazia; Qatar University, Department of Public Health, College of Health Sciences, QU Health<br>Nur, Ula; Qatar University, Department of Public Health, College of Health Sciences, QU Health                                           |
| <b>Primary Subject Heading</b>: | Epidemiology                                                                                                                                                                                                                                      |
| Secondary Subject Heading:      | Public health, Health services research                                                                                                                                                                                                           |
| Keywords:                       | PUBLIC HEALTH, EPIDEMIOLOGY, HEALTH SERVICES ADMINISTRATION & MANAGEMENT, Health policy < HEALTH SERVICES ADMINISTRATION & MANAGEMENT, Quality in health care < HEALTH SERVICES ADMINISTRATION & MANAGEMENT, Community child health < PAEDIATRICS |
|                                 |                                                                                                                                                                                                                                                   |

SCHOLARONE™  
Manuscripts

1  
2  
3 **Effect of Pre-pregnancy maternal BMI on adverse pregnancy and neonatal**  
4 **outcomes: Results from a retrospective cohort study of a multi-ethnic**  
5 **population in Qatar**  
6  
7  
8  
9

10 Shazia Shaukat<sup>1</sup> and Ula Nur<sup>1</sup>  
11  
12

13 <sup>1</sup>Department of Public Health, College of Health Sciences, QU Health, Qatar University, Doha,  
14  
15 Qatar  
16  
17

18  
19  
20 Correspondance to: Ula Nur, Department of Public Health, College of Health Sciences, Qatar  
21  
22 University, Doha, Qatar  
23

24 Ula.nur@qu.edu.qa  
25  
26

27 *Key words: Maternal BMI, Pregnancy Outcomes, Nulliparous, Maternal Health*  
28

29 Word Count: 3051  
30  
31  
32  
33  
34  
35  
36  
37  
38  
39  
40  
41  
42  
43  
44  
45  
46  
47  
48  
49  
50  
51  
52  
53  
54  
55  
56  
57  
58  
59  
60

## Abstract

**Background** Given the small number of studies on the topic, we aimed to identify the impact of pre-pregnancy maternal body mass index (BMI) on adverse pregnancy outcomes (POs) in a low-risk, multiethnic population, and to calculate related population attributable fractions (PAFs).

**Methods** This retrospective cohort study included 1134 nulliparous women of 50 nationalities (classified into Arab and non-Arab ethnicity) in Qatar who had their first antenatal visit at a Primary Health Care Corporation (PHCC) facility in June 2016-March 2017 and their PO at a Hamad Medical Corporation (HMC) facility before 10 November 2017. We used multiple imputation to handle missing values and multivariate logistic regression to calculate adjusted odds ratios (aOR) for adverse POs in overweight and obese women.

**Results** Overweight and obese Arab women were at high risk for gestational diabetes mellitus (GDM) (aOR=2.38, 95%CI 1.51–3.84) and caesarean section (aOR=1.57, 95%CI 1.00–2.48). Obese non-Arab women were at high risk for preeclampsia (aOR=3.83, 95%CI 1.00–15.00). PAFs showed that 41.63% of preeclampsia, 17.36% of pregnancy-induced hypertension, 17.17% of large for gestational age, 15.89% of preterm deliveries, 14.75% of GDM, and 13.99% of caesarean sections could be avoided if all mothers had normal pre-pregnancy BMI. There were no major differences in PAFs by ethnicity.

**Conclusion** Adverse POs were attributable to maternal obesity. This suggests that, in contrast to existing PHCC protocol, overweight and obese women in Qatar should be targeted earlier in their pregnancy; preferably prior to getting pregnant. We observed ethnic differences in the risk of adverse POs.

## Article Summary

### Strengths and Limitations of this Study

- The study identifies overweight and obese nulliparous mothers who are at risk for maternal and neonatal complications using specific Body Mass Index cut offs applicable for a multi-ethnic diverse population.
- The study compares the risks across Arab and Non-Arab maternal ethnic groups
- The study uses multiple imputation techniques to handle missing BMI data
- The study used nationality as a surrogate for ethnicity which was valid in this sample given the dichotomous nature of the grouping used.
- The study did not consider potential confounders such as socioeconomic status since such data was not available in the dataset.

## Background

More than half of women of child bearing age in the developed world are either overweight or obese<sup>1</sup>, and the percentage of women who are obese at their first antenatal visit nearly doubled between 1990 and 2004<sup>2</sup>. Maternal obesity has been associated with infertility and can cause spontaneous pregnancy loss in early gestation<sup>3</sup>. Gestational diabetes<sup>4</sup>, preeclampsia<sup>5</sup>, gestational hypertension, depression, instrumental vaginal delivery, caesarean section delivery<sup>6</sup>, and surgical site infection have been associated with maternal obesity<sup>7</sup>. Maternal obesity can also impact neonatal outcomes, such as pre-term birth, large for gestational age babies, fetal defects, congenital anomalies, and perinatal death. Length of hospital stay was also reported as an adverse outcome of maternal obesity<sup>7</sup>.

Most published studies on the effect of obesity on pregnancy outcomes have focused on primarily homogenous regional populations that are not ethnically diverse<sup>8</sup>, but some researchers have shown that ethnic differences can have an impact on the association between obesity and adverse pregnancy outcomes<sup>9</sup>. This impact is particularly relevant for countries like Qatar, which has a diverse, multiethnic, transient population. The 2012 World Health Organization (WHO) STEPwise approach to Surveillance survey for Qatar showed that 68.3% of adult females were overweight and 43.2% were obese<sup>10</sup>, highlighting the significance of the maternal obesity problem in the country. The public health care system in Qatar is broken down into primary and secondary/tertiary care systems, with primary care administered by the Primary Health Care Corporation (PHCC), and secondary/tertiary care administered by the Hamad Medical Corporation (HMC). Both systems classify pregnancies as high-risk when the mother is obese Class III or higher (body mass index [BMI]  $\geq 40$  kg/m<sup>2</sup>), has a pre-existing medical condition, and/or obstetric complications, as per the guidelines of the Ministry of Health. Women with high-risk pregnancies

1  
2  
3 are directly referred to dedicated antenatal clinics of the HMC for specialized management.  
4  
5 However, women with a BMI  $<40$  kg/m<sup>2</sup>, but who are still overweight or obese, are cared for  
6  
7 through the PHCC; they are referred to the HMC only if they develop complications or for  
8  
9 delivery.  
10

11  
12 Population attributable fractions (PAFs) are used to identify the burden of risk factors for a  
13  
14 disease or condition in a given population<sup>11</sup>. Few studies have looked at PAFs of maternal obesity  
15  
16 <sup>12</sup>. Obesity is highly prevalent in Qatar, hence it is critical to study PAFs associated with obesity  
17  
18 in different ethnic groups to quantify the burden of disease that can be attributed to obesity, and  
19  
20 thereby help develop targeted management strategies. We aimed to identify the impact of pre-  
21  
22 pregnancy maternal BMI on adverse pregnancy outcomes in a low-risk, multi-ethnic population,  
23  
24 and to calculate related PAFs.  
25  
26  
27  
28  
29  
30  
31  
32  
33  
34  
35  
36  
37  
38  
39  
40  
41  
42  
43  
44  
45  
46  
47  
48  
49  
50  
51  
52  
53  
54

## Methods

The PHCC Database is linked to the Birth Register of Qatar; it includes information on all PHCC visits, and thus includes pre-pregnancy and maternal characteristics (e.g., age, nationality, pre-existing conditions), and pregnancy and neonatal outcomes. For this retrospective cohort study, we used the PHCC Database to identify all nulliparous women with singleton pregnancies who had their first antenatal visit at a PHCC facility between 1 June 2016 and 1 March 2017 and their pregnancy outcome at a HMC facility before 10 November 2017 (n=1245). The follow-up care for the mother and child initially happens at HMC and may then refer back to PHCC, however, this follow-up care was outside the scope of our study. We wanted to target women with low-risk pregnancies as defined by the Ministry of Health of Qatar. Therefore we excluded women with high-risk pregnancies, i.e., those with a pregnancy outcome prior to 24 weeks of gestation (n=8), those who were obese Class II and higher (BMI  $\geq 35$  kg/m<sup>2</sup>, n=80), or who were under the age of 18 at their first antenatal visit (n=23). Women who gave birth to babies with indeterminate sex (n=2), or who experienced still birth (n=3), fetal death (n=4), or neonatal death (n=1) were also excluded. Among the exclusions were 10 women who met more than one exclusion criterion; therefore, the final study sample consisted of 1,134 women. The anonymized data used in this study was provided after the approval of the study by the research section of the PHCC (reference number PHCC/RS/17/07/007) and the Institutional Review Board (IRB) of Qatar University (Reference **QU-IRB 846-E/17**).

## Patient and Public Involvement

1  
2  
3 This study involved secondary analysis of data collected by PHCC during its routine interactions  
4 with the patients. No additional patient or public contact was undertaken in this study.  
5  
6  
7  
8  
9

### 10 **Maternal ethnicity**

11  
12 Included women were of 50 unique nationalities, and maternal ethnicity was categorized as Arab  
13 or non-Arab based on nationality. Women were designated as Arab if they were citizens of one  
14 of the 22 countries included in the list of League of Arab States (LAS)<sup>13</sup>. Our Arab study women  
15 came from 18 of these countries (Algeria, Bahrain, Egypt, Iraq, Jordan, Kuwait, Lebanon, Libya,  
16 Morocco, Oman, Palestine, Qatar, Saudi Arabia, Sudan, Syria, Tunis, United Arab Emirates, and  
17 Yemen). The LAS have a common language (Arabic) and share a number of cultural, social, and  
18 dietary habits which may put them at different lifestyle and obesity-related risks as compared to  
19 non-Arabs. Women of other nationalities were designated as non-Arabs.  
20  
21  
22  
23  
24  
25  
26  
27  
28  
29  
30  
31  
32

### 33 **Pre-pregnancy body mass index**

34  
35 Pre-pregnancy BMI was calculated based on information recorded at the most recent pre-  
36 pregnancy visit available in the Primary Health Care Center Database. If this primary care visit  
37 was prior to 12 weeks from the date of the first antenatal visit, the BMI was treated as missing.  
38  
39 Pre-pregnancy BMI was categorized as normal weight (BMI <25 kg/m<sup>2</sup>) overweight (BMI 25-  
40 29.99 kg/m<sup>2</sup>), and obese (BMI ≥30) based on standard WHO guidelines<sup>14</sup>. However, different  
41 BMI cut-offs were applied to Asians (n=405, overweight: BMI 23-27.5 kg/m<sup>2</sup>; obese: BMI ≥27.5  
42 kg/m<sup>2</sup>), as recommended by the WHO expert consultation<sup>15</sup>. Sensitivity analyses, the results of  
43 which are not presented in this manuscript, showed that our application of different BMI cut-offs  
44 for Asians was valid, as using standard cut-offs underestimated the risk in that population.  
45  
46  
47  
48  
49  
50  
51  
52  
53  
54  
55  
56  
57  
58  
59  
60



### **Adverse pregnancy outcomes, adverse neonatal outcomes, and risk factors**

Investigated adverse pregnancy outcomes included GDM, pregnancy-induced hypertension (PIH), preeclampsia, preterm delivery, assisted vaginal delivery, and caesarean section. Investigated adverse neonatal outcomes included macrosomia, large for gestational age, small for gestational age, neonatal intensive care unit referrals, and Apgar score <7 at 1 minute. Risk factors considered included maternal age, maternal ethnicity, and pre-existing conditions such as diabetes mellitus type 1 or 2, hypertension, and thyroid conditions. Retrospective review of patient medical records including doctors' notes were used to identify pre-existing conditions and most adverse outcomes such as GDM. Diagnosis of macrosomia, LGA and SGA was based off of the Weight Percentiles Calculator available from the WHO website<sup>16 17</sup>.

### **Statistical analysis**

Maternal characteristics and risk factors were tabulated using the observed data, and differences in the demographics across BMI categories were compared using Pearson's chi squared test. Thereafter, as pre-pregnancy BMI was not available for 101 (8.9%) of the study subjects, multiple imputation was performed to assign these values, with the underlying assumption that BMI values were missing at random<sup>18 19</sup>. Univariate and multivariate associations between maternal BMI category and adverse pregnancy and neonatal outcomes were assessed by logistic regression, using the imputed dataset.

Known and potential risk factors such as maternal age at first antenatal visit, pre-existing diabetes mellitus type 1 or 2, pre-existing hypertension, and pre-existing thyroid conditions were included as covariates in the final model. Maternal ethnicity was assessed as potential risk factor

1  
2  
3 while computing adjusted odds ratios (ORs) for associations between BMI category and adverse  
4 pregnancy and neonatal outcomes. Subgroup analysis was conducted by computing crude and  
5 adjusted ORs for adverse pregnancy and neonatal pregnancy outcomes separately for Arab and  
6  
7  
8  
9  
10 Non-Arab mothers.

11  
12 The adjusted ORs were used to compute PAFs of overweight and obesity for Arab and non-  
13 Arab mothers. PAFs were used to estimate the proportion of adverse pregnancy and neonatal  
14 outcomes that could be prevented if either one of two scenarios were true<sup>20</sup>: 1) if overweight and  
15 obese women were all of normal weight before pregnancy; 2) if overweight and obese mothers  
16 had a one-category drop in BMI before pregnancy (i.e., obese to overweight, and overweight to  
17 normal weight). Scenario 0 was denoted the reference scenario, i.e., the current population as  
18 represented by the data. These scenarios were also analysed by ethnicity.  
19  
20  
21  
22  
23  
24  
25  
26  
27  
28  
29

30 PAFs and corresponding 95% confidence intervals (CIs) were computed using a user-written  
31 procedure (punaf) in the Stata software<sup>20</sup>. All analyses in this research report were performed using  
32 the Stata 15<sup>21</sup> software package and Microsoft Excel. The significance level for this study was set  
33 at 5%, so p-value  $\leq 0.05$  was considered statistically significant.  
34  
35  
36  
37  
38  
39  
40  
41  
42

## 43 **Results**

44  
45 In our study sample, 86.33% of women were aged 18-30 years and 59.17% were of Arab ethnicity.  
46  
47 The study sample included women from 50 countries, representing an extremely diverse data set.  
48  
49 The most common risk factor among obese women was pre-existing thyroid conditions (5.22%).  
50  
51  
52  
53  
54  
55  
56  
57  
58  
59  
60

1  
2  
3 Term deliveries (gestational age 37-41 weeks) accounted for 89.77% of births in the study sample  
4  
5 (Table 1a).  
6

7  
8 **==Insert Table 1(a) here ==**  
9

10  
11  
12 GDM was the most common adverse pregnancy outcome and was observed in 35.89% of the  
13  
14 study sample, followed by cesarean section (24.96%). Preeclampsia was observed in 3.44% of the  
15  
16 study sample. The prevalence of GDM, cesarean section, and preeclampsia increased with  
17  
18 increasing BMI category (Table 1b).  
19

20  
21  
22 **== Insert Table 1(b) here ==**  
23  
24

25  
26 Obese Arab mothers had statistically significant, higher odds of developing GDM (adjusted  
27  
28 OR=2.41, 95% CI 1.51–3.84,  $p < 0.01$ ) when compared to normal-weight Arab mothers. Although  
29  
30 the odds were higher for obese non-Arab mothers when compared to their normal-weight  
31  
32 counterparts (adjusted OR=1.58, 95% CI 0.96–2.62,  $p = 0.07$ ), these odds were not as high as those  
33  
34 observed for Arab mothers, and the association was not statistically significant. Obese non-Arab  
35  
36 women showed significantly higher odds (adjusted OR=3.83, 95% CI 0.98–15.00,  $p = 0.05$ ) of  
37  
38 developing preeclampsia when compared to normal-weight non-Arab women. Finally, the odds of  
39  
40 caesarean section were significant among overweight Arab mothers, as compared to their normal-  
41  
42 weight counterparts (adjusted OR=1.57, 95% CI 1.00–2.48,  $p = 0.05$ ), but this association was not  
43  
44 significant among obese Arab mothers or among obese non-Arab mothers when compared to their  
45  
46 normal-weight counterparts (Table 2). Although higher odds were observed in obese (Figure 1) and  
47  
48 overweight (Figure 2) mothers in both ethnic groups,  $p$ -values were not statistically significant for  
49  
50 most adverse pregnancy or neonatal outcomes when compared to normal-weight counterparts.  
51  
52  
53  
54

1  
2  
3 **==Insert Table 2 here==**  
4

5 **== Insert Figure 1 here==**  
6

7 **== Insert Figure 2 here==**  
8  
9

### 10 11 12 13 14 **Population attributable fractions**

15  
16  
17 For preeclampsia, a one-category reduction in BMI among Arab mothers corresponded to a PAF  
18 of 46.28% for obese women and 38.61% for overweight women (Figure 3). For PIH, a one-  
19 category drop in BMI for obese women corresponded to a PAF of 50.83%, meaning that 50.83%  
20 of PIH cases could be avoided if obese mothers reduced their BMI category to overweight (Figure  
21 3). Corresponding PAFs for neonatal outcomes were 65.23% for macrosomia and 30.42% for  
22 Apgar score <7 at 1 minute. Some of the CIs and PAFs were negative (e.g., small for gestational  
23 age and assisted vaginal delivery), indicating a protective effect of obesity on these outcomes,  
24 which means that removing obesity could increase these risks (Tables 3 and 4).  
25  
26  
27  
28  
29  
30  
31  
32

33 **== Insert tables 3 and 4 here ==**  
34

35  
36  
37 For GDM, a one-category reduction in BMI corresponded to a PAF of 24.72% and 24.58%  
38 for obese Arab and non-Arab mothers, respectively (Figure 3). The PAF for macrosomia if all  
39 women were of normal weight before pregnancy was 13.73% for non-Arab women, and 6.78%  
40 for Arab mothers (Figure 4). The PAFs for neonatal outcomes after a one-category reduction in  
41 BMI are not shown in the Figure 3 and Figure 4, as they are mostly negative due to the small  
42 number of cases.  
43  
44  
45  
46  
47  
48  
49  
50

51 **=== Insert Figures 3 and 4 here ===**  
52  
53  
54

## Discussion

Our study confirms that there is an association between pre-pregnancy maternal BMI and adverse pregnancy and neonatal pregnancy outcomes in multi-ethnic populations, using adjusted ORs and PAFs. Previous studies have shown similar strengths of association between overweight and obesity and GDM<sup>22</sup>, PIH<sup>22-23</sup>, preterm delivery<sup>12-24</sup>, assisted vaginal delivery<sup>22-25</sup>, caesarean section<sup>22-25</sup>, macrosomia<sup>12</sup>, large for gestational age<sup>24</sup> and small for gestation age<sup>24-25</sup>. However, the present study found much higher ORs for preeclampsia in non-Arab mothers. This could be attributed to the large portion of Asian mothers in the non-Arab group, who have been reported to be susceptible to preeclampsia<sup>26</sup>.

Our results confirm those of a recent study on nulliparous women in Qatar, which reported a higher incidence of GDM, caesarean section, and PIH in obese women<sup>27</sup>, whereas overweight women were reported to have higher caesarean section rates only<sup>27</sup>. However, the overall incidence of these outcomes was much lower than in our study sample (GDM: 15% vs 35.89% in our study sample; caesarean section: 16% vs 24.98%). These difference cannot be explained by the data alone, since the earlier study<sup>27</sup> was carried out in a tertiary care setting, whereas this research focused on primary care settings.

The PAFs we report are much higher than those from some published studies<sup>12</sup>, due to the high prevalence of overweight and obesity (i.e., exposure) in our study sample. Preeclampsia stands out, as any reduction in BMI category yielded a substantial reduction in the burden of this condition. A one-category reduction in BMI showed a much higher possibility of disease reduction among obese women than among overweight women, whether they were Arab or non-Arab. However, caesarean section was an exception to this trend, and showed a lesser PAF for a one-category reduction in BMI among obese women than overweight women. This can be explained

1  
2  
3 by the higher OR for caesarean section in overweight women as compared to obese women in both  
4  
5 ethnic groups. It should be noted that a causal relationship between exposures and outcomes is  
6  
7 generally assumed in PAF calculations. However, this relationship may not necessarily exist, and  
8  
9 PAFs should be considered accordingly.  
10

11  
12 Unlike other reports, the exposure variable in our study was not self-reported. We used  
13  
14 standard WHO recommended BMI cut-offs, except in the Asian population, in which Asian-  
15  
16 specific cut-offs were applied. Results of a sensitivity analysis indicated that the use of these Asian-  
17  
18 specific cut-offs is indeed clinically important in multiethnic populations. Indeed, Asian mothers  
19  
20 must be classified as overweight and obese using the WHO-recommended cut-offs for Asians,  
21  
22 otherwise high-risk patients may not be properly identified during antenatal care.  
23  
24

25  
26 Patient nationality was used as a surrogate for ethnicity, but it is common for people to change  
27  
28 their citizenship through immigration, which could have limited the strength of the conclusions of  
29  
30 this study. However, a detailed analysis of nationalities revealed that the number of patients  
31  
32 claiming citizenship to countries that are most likely targets for migrants was minimal  
33  
34 (Canadians=0, Australians=0, Americans=3, British=1, French=1). Therefore, the use of  
35  
36 nationality as a surrogate for ethnicity is reasonable and valid for this dataset.  
37  
38

39  
40 Other reports from Qatar showed higher rates of conditions such as diabetes mellitus and  
41  
42 cardiovascular diseases, which were not reflected in our study. These low rates may represent an  
43  
44 information bias which did not allow us to properly adjust for potential confounders. Data on  
45  
46 socioeconomic status and health center location were not available; hence it is not possible to  
47  
48 attribute missing values to these factors or to any other variables for which data was not  
49  
50 available.  
51  
52  
53  
54

1  
2  
3 GDM, preeclampsia, and cesarean section were significantly associated with pre-pregnancy  
4 BMI among our overweight and obese mothers, who are not generally considered to have at-risk  
5 pregnancies by the health care system in Qatar. High prevalence of GDM in normal-weight  
6 mothers (29.21%) indicates that BMI alone cannot explain the problem, which is instead related  
7 to population norms and characteristics. High risk of preeclampsia in overweight and obese  
8 mothers, especially among non-Arabs, indicates that early screening and management of  
9 hypertensive disorders is needed for this group. This implies that clinical screening is indicated  
10 for all mothers regardless of their pre-pregnancy BMI or ethnicity, preferably at the start of  
11 pregnancy.  
12  
13  
14  
15  
16  
17  
18  
19  
20  
21  
22  
23

24 The rate of cesarean section was very high in our study sample (25%), especially considering  
25 that pregnancies in overweight and obese women are currently considered low-risk by the health  
26 care system in Qatar. The odds of cesarean section were uncharacteristically high and similar in  
27 overweight and obese mothers regardless of ethnicity. Clinical implications cannot be drawn  
28 from these results without properly separating the cesarean sections by their indications  
29 (medically necessary vs elective), which were not available in the study sample. Our findings of  
30 an association between pre-pregnancy maternal BMI and cesarean section may not properly  
31 represent the true nature of the outcome risk and exposure, and should therefore be interpreted  
32 with caution.  
33  
34  
35  
36  
37  
38  
39  
40  
41  
42  
43

44 As has been mentioned in above paragraphs, the retrospective cohort nature of this study  
45 limited our ability to validate or verify the elements of the dataset and other potential  
46 confounders through additional patient contact. The anonymity of the data by design made it  
47 impossible to undertake such a follow up. The strength of our findings is therefore directly  
48 related to the strength of the dataset used. The number of missing values in the exposure  
49  
50  
51  
52  
53  
54  
55

1  
2  
3 variable, the pre-pregnancy BMI, meant that we were unable to ascertain a direct relationship for  
4 those records. However, the impact of such was minimized by using the multiple imputation  
5 techniques. The PAFs were computed using the punaf user written extension for Stata software  
6 and manual calculations for such cannot be undertaken due to the computational complexity of  
7 the task.  
8  
9  
10  
11  
12  
13

14 Adverse pregnancy outcomes were attributable to maternal obesity for even low risk patients.  
15 This suggests that, in contrast to the existing PHCC protocol which focuses only on high-risk  
16 pregnancies for intervention, overweight and obese women in Qatar should also be targeted earlier  
17 in their pregnancy, preferably prior to getting pregnant. We observed ethnic differences in the risk  
18 of adverse pregnancy outcomes. Planning and prevention approaches at the pre-conception stage  
19 are needed to raise awareness and reduce the burden of these adverse outcomes on the health care  
20 system. There is a need for an ecological approach that addresses societal, cultural, and personal  
21 influences by promoting good health at all levels. A top-down approach would work best to  
22 formulate public health policy to combat the issues raised. A combination of these public health  
23 interventions can help achieve the WHO Non-Communicable Disease Targets for the Global  
24 Action Plan by 2025.  
25  
26  
27  
28  
29  
30  
31  
32  
33  
34  
35  
36  
37  
38  
39  
40  
41  
42  
43  
44  
45  
46  
47  
48  
49  
50  
51  
52  
53  
54  
55  
56  
57  
58  
59  
60



### Author affiliations:

<sup>1</sup>Department of Public Health, College of Health Sciences, QU Health, Qatar University, Doha, Qatar.

**Contributors** Conceptualization, S.S. and U.N.; methodology, S.S. and U.N.; software, S.S.; validation, S.S. and U.N.; formal analysis, S.S.; investigation, S.S. and U.N.; resources, S.S.; data curation, S.S.; writing—original draft preparation, S.S.; writing—review and editing, S.S. and U.N.; visualization, S.S. and U.N.; supervision, U.N. ; project administration, S.S.; funding acquisition, U.N.

**Funding** This work has been funded by Qatar university (grant no: QUST-1-CHS-2018-14) and Qatar National Library.

**Disclaimer** All authors have seen and approved the final version of the manuscript being submitted. They warrant that the article is the authors' original work, has not received prior publication and is not under consideration for publication elsewhere.

**Competing interests** None declared.

**Patient consent for publication** Not required.

**Ethics approval** Ethical approval was obtained from The Primary Health Care Corporation (Reference Number **PHCC/RS/17/07/007**) on October 3, 2017 and the Institutional Review Board (IRB) of Qatar University (Reference **QU-IRB 846-E/17**) on November 11, 2017.

**Data availability statement** The database analysed for this research include information on all antenatal visits to Primary Health Care Centres, between 1 June 2016 and 1 March 2017. Data can be obtained by request from the Primary Health Corporation in Qatar.

**Provenance and peer review** Not commissioned; externally peer reviewed.

**Open access** This is an open access article distributed in accordance with the Creative Commons Attribution Non Commercial (CC BY-NC 4.0) license, which permits others to distribute, remix, adapt, build upon this work non-commercially, and license their derivative works on different terms, provided the original work is properly cited, appropriate credit is given, any changes made indicated, and the use is non-commercial. See: <http://creativecommons.org/licenses/by-nc/4.0/>.

### References

1. Finucane MM, Stevens GA, Cowan MJ, et al. National, regional, and global trends in body-mass index since 1980: systematic analysis of health examination surveys and epidemiological studies with 960 country-years and 9·1 million participants. *The Lancet* 2011;377(9765):557-67.

- 1  
2  
3 2. Kanagalingam MG, Forouhi NG, Greer IA, et al. Changes in booking body mass index over a  
4 decade: retrospective analysis from a Glasgow Maternity Hospital. *BJOG: An International*  
5  
6 *Journal of Obstetrics & Gynaecology* 2005;112(10):1431-33. doi: 10.1111/j.1471-  
7  
8 0528.2005.00685.x  
9
- 10  
11  
12 3. Catalano PM, Shankar K. Obesity and pregnancy: mechanisms of short term and long term  
13  
14 adverse consequences for mother and child. *BMJ* 2017;356:j1.  
15
- 16  
17 4. Torloni M, Betrán A, Horta B, et al. Prepregnancy BMI and the risk of gestational diabetes: a  
18  
19 systematic review of the literature with meta-analysis. *Obesity Reviews* 2009;10(2):194-203.  
20  
21
- 22 5. O'Brien TE, Ray JG, Chan W-S. Maternal body mass index and the risk of preeclampsia: a  
23  
24 systematic overview. *Epidemiology* 2003;14(3):368-74.  
25
- 26  
27 6. Poobalan AS, Aucott LS, Gurung T, et al. Obesity as an independent risk factor for elective  
28  
29 and emergency caesarean delivery in nulliparous women – systematic review and meta-  
30  
31 analysis of cohort studies. *Obesity Reviews* 2009;10(1):28-35. doi: 10.1111/j.1467-  
32  
33 789X.2008.00537.x  
34
- 35  
36 7. Marchi J, Berg M, Dencker A, et al. Risks associated with obesity in pregnancy, for the  
37  
38 mother and baby: a systematic review of reviews. *Obesity Reviews* 2015;16(8):621-38. doi:  
39  
40 10.1111/obr.12288  
41
- 42  
43 8. Knight M, Kurinczuk JJ, Spark P, et al. Inequalities in maternal health: national cohort study  
44  
45 of ethnic variation in severe maternal morbidities. *BMJ* 2009;338:b542.  
46
- 47  
48 9. Makgoba M, Savvidou M, Steer P. An analysis of the interrelationship between maternal age,  
49  
50 body mass index and racial origin in the development of gestational diabetes mellitus.  
51  
52 *BJOG: An International Journal of Obstetrics & Gynaecology* 2012;119(3):276-82.  
53  
54

- 1  
2  
3 10. WHO. Qatar STEPS Survey 2012 - Fact Sheet: World Health Organization; 2012 [Available  
4  
5 from: [http://www.who.int/chp/steps/Qatar\\_FactSheet\\_2012.pdf](http://www.who.int/chp/steps/Qatar_FactSheet_2012.pdf)2017.  
6  
7
- 8 11. Greenland S, Drescher K. Maximum likelihood estimation of the attributable fraction from  
9  
10 logistic models. *Biometrics* 1993;865-72.  
11
- 12 12. Oteng-Ntim E, Kopeika J, Seed P, et al. Impact of obesity on pregnancy outcome in different  
13  
14 ethnic groups: calculating population attributable fractions. *PLoS One* 2013;8(1):e53749.  
15  
16
- 17 13. LAS. League of Arab States 2018 [Available from:  
18  
19 <http://www.lasportal.org/en/Pages/default.aspx> accessed March 08, 2018 2018.  
20  
21
- 22 14. WHO. Physical status: The use of and interpretation of anthropometry, Report of a WHO  
23  
24 Expert Committee. 1995  
25
- 26 15. WHO Expert Consultation. Appropriate body-mass index for Asian populations and its  
27  
28 implications for policy and intervention strategies. *Lancet* 2004;363(9403):157-63. doi:  
29  
30 10.1016/S0140-6736(03)15268-3  
31  
32
- 33 16. WHO. Weight Percentiles Calculator: World Health Organization; 2017 [Available from:  
34  
35 [https://www.who.int/reproductivehealth/topics/best\\_practices/weight\\_percentiles\\_calculator.](https://www.who.int/reproductivehealth/topics/best_practices/weight_percentiles_calculator.xls)  
36  
37 [xls](https://www.who.int/reproductivehealth/topics/best_practices/weight_percentiles_calculator.xls)2017.  
38  
39
- 40 17. Mikolajczyk RT, Zhang J, Betran AP, et al. A global reference for fetal-weight and  
41  
42 birthweight percentiles. *Lancet* 2011;377(9780):1855-61. doi: 10.1016/s0140-  
43  
44 6736(11)60364-4 [published Online First: 2011/05/31]  
45  
46
- 47 18. Sterne JAC, White IR, Carlin JB, et al. Multiple imputation for missing data in  
48  
49 epidemiological and clinical research: potential and pitfalls. *BMJ* 2009;338 doi:  
50  
51 10.1136/bmj.b2393  
52  
53  
54  
55

- 1  
2  
3 19. StataCorp LP. Stata data analysis and statistical Software. *Special Edition Release*  
4  
5 2017;15:733.  
6
- 7  
8 20. Newson RB. Attributable and unattributable risks and fractions and other scenario  
9  
10 comparisons. *Stata J* 2013;13(4):672-98.  
11
- 12 21. Stata. Data Analysis and Statistical Software | Stata Release 15 2017 [Available from:  
13  
14 <https://www.stata.com/>.  
15
- 16  
17 22. El-Chaar D, Finkelstein SA, Tu X, et al. The Impact of Increasing Obesity Class on  
18  
19 Obstetrical Outcomes. *Journal of Obstetrics and Gynaecology Canada* 2013;35(3):224-33.  
20  
21 doi: 10.1016/s1701-2163(15)30994-4  
22
- 23  
24 23. Metsälä J, Stach-Lempinen B, Gissler M, et al. Risk of Pregnancy Complications in Relation  
25  
26 to Maternal Prepregnancy Body Mass Index: Population-Based Study from Finland 2006-  
27  
28 102015.  
29
- 30  
31 24. El Rafei R, Abbas HA, Charafeddine L, et al. Association of Pre-Pregnancy Body Mass  
32  
33 Index and Gestational Weight Gain with Preterm Births and Fetal Size: an Observational  
34  
35 Study from Lebanon. *Paediatric and perinatal epidemiology* 2016;30(1):38-45.  
36
- 37  
38 25. Li C, Liu Y, Zhang W. Joint and Independent Associations of Gestational Weight Gain and  
39  
40 Pre-Pregnancy Body Mass Index with Outcomes of Pregnancy in Chinese Women: A  
41  
42 Retrospective Cohort Study. *PLoS ONE* 2015;10(8):e0136850. doi:  
43  
44 10.1371/journal.pone.0136850  
45
- 46  
47 26. Snowden JM, Mission JF, Marshall NE, et al. The Impact of maternal obesity and  
48  
49 race/ethnicity on perinatal outcomes: Independent and joint effects. *Obesity (Silver Spring)*  
50  
51 2016;24(7):1590-8. doi: 10.1002/oby.21532  
52  
53  
54  
55

- 1  
2  
3 27. Sharara HA, Rhaman LNA, Ummunnisa F, et al. Obese nulliparous women and the risk for  
4  
5 maternal and fetal complications. *Open Journal of Obstetrics and Gynecology* 2014;2014  
6  
7  
8  
9  
10  
11  
12  
13  
14  
15  
16  
17  
18  
19  
20  
21  
22  
23  
24  
25  
26  
27  
28  
29  
30  
31  
32  
33  
34  
35  
36  
37  
38  
39  
40  
41  
42  
43  
44  
45  
46  
47  
48  
49  
50  
51  
52  
53  
54  
55  
56  
57  
58  
59  
60

For peer review only

## List of figures

**Figure 1: Adjusted odds ratios and 95% confidence intervals for obese nulliparous mothers by ethnicity**

**Figure 2: Adjusted odds ratios and 95% confidence intervals for overweight nulliparous mothers by ethnicity**

**Figure 3: Population attributable fractions for Arab and non-Arab mothers for pregnancy outcomes for Scenario 1 (all to normal weight) and Scenario 2 (one-category decrease in body mass index)**

Abbreviations: GDM, C-section

**Figure 4 : Population attributable fractions for Arab and non-Arab mothers for neonatal outcomes for Scenario 2 (one-category decrease in body mass index)**

Abbreviations: NICU, neonatal intensive care unit; LGA, large for gestational age

## List of tables

**Table 1(a): Selected characteristics of the study sample by pre-pregnancy maternal body mass index (BMI) in Qatar (N=1134)**

**Table 1(b): Distribution of adverse pregnancy and neonatal outcomes by pre-pregnancy maternal body mass index (BMI) in Qatar (N=1134)**

**Table 2: Odds ratios (ORs) and 95% confidence intervals (CIs) of the association between adverse pregnancy and neonatal pregnancy outcomes and body mass index (BMI) category by ethnicity after multiple imputation (N=1134)**

**Table 3: Population attributable fractions (PAFs) % and 95% confidence intervals (CI) of adverse pregnancy and neonatal outcomes by pre-pregnancy body mass index among Arab mothers**

**Table 4: Population attributable fractions (PAFs) % and 95% confidence intervals (CI) of adverse pregnancy and neonatal outcomes by pre-pregnancy body mass index among non-Arab mothers**

Table 1(a): Selected characteristics of the study sample by pre-pregnancy maternal body mass index (BMI) in Qatar (N=1134)

|                                                   |                 | Pre-pregnancy BMI category |                    |               |                 | Total        | P-Value          |
|---------------------------------------------------|-----------------|----------------------------|--------------------|---------------|-----------------|--------------|------------------|
|                                                   |                 | Normal Weight (N=404)      | Overweight (N=399) | Obese (N=230) | Missing (N=101) | (N=1134)     |                  |
| <b>Maternal Age (years)</b>                       |                 |                            |                    |               |                 |              | <b>&lt;0.001</b> |
|                                                   | <b>18-24</b>    | 212(52.48%)                | 141(35.34%)        | 73(31.74%)    | 48(47.52%)      | 474(41.8%)   |                  |
|                                                   | <b>25-30</b>    | 157(38.86%)                | 195(48.87%)        | 114(49.57%)   | 39(38.61%)      | 505(44.53%)  |                  |
|                                                   | <b>31-44</b>    | 35(8.66%)                  | 63(15.79%)         | 43(18.7%)     | 14(13.86%)      | 155(13.67%)  |                  |
| <b>Maternal Ethnicity</b>                         |                 |                            |                    |               |                 |              | <b>0.005</b>     |
|                                                   | <b>Arab</b>     | 254(62.87%)                | 240(60.15%)        | 114(49.57%)   | 63(62.38%)      | 671(59.17%)  |                  |
|                                                   | <b>Non-Arab</b> | 150(37.13%)                | 159(39.85%)        | 116(50.43%)   | 38(37.62%)      | 463(40.83%)  |                  |
| <b>Pre-existing Hypertension</b>                  |                 |                            |                    |               |                 |              | 0.94             |
|                                                   | <b>Yes</b>      | 8(1.98%)                   | 10(2.51%)          | 4(1.74%)      | 2(1.98%)        | 24(2.12%)    |                  |
|                                                   | <b>No</b>       | 396(98.02%)                | 389(97.49%)        | 226(98.26%)   | 99(98.02%)      | 1110(97.88%) |                  |
| <b>Pre-existing Diabetes Mellitus Type 1 or 2</b> |                 |                            |                    |               |                 |              | 0.67             |
|                                                   | <b>Yes</b>      | 5(1.24%)                   | 4(1%)              | 4(1.74%)      | 0(0%)           | 13(1.15%)    |                  |
|                                                   | <b>No</b>       | 399(98.76%)                | 395(99%)           | 226(98.26%)   | 101(100%)       | 1121(98.85%) |                  |
| <b>Pre-existing Thyroid Condition</b>             |                 |                            |                    |               |                 |              | 0.22             |
|                                                   | <b>Yes</b>      | 18(4.46%)                  | 10(2.51%)          | 12(5.22%)     | 2(1.98%)        | 42(3.7%)     |                  |
|                                                   | <b>No</b>       | 386(95.54%)                | 389(97.49%)        | 218(94.78%)   | 99(98.02%)      | 1092(96.3%)  |                  |
| <b>Gestational Age at Delivery (weeks)</b>        |                 |                            |                    |               |                 |              | 0.60             |
|                                                   | <b>&lt;37</b>   | 32(7.92%)                  | 40(10.03%)         | 28(12.17%)    | 10(9.9%)        | 110(9.7%)    |                  |
|                                                   | <b>37-41+6d</b> | 370(91.58%)                | 357(89.47%)        | 200(86.96%)   | 91(90.1%)       | 1018(89.77%) |                  |
|                                                   | <b>≥42</b>      | 2(0.5%)                    | 2(0.5%)            | 2(0.87%)      | 0(0%)           | 6(0.53%)     |                  |

Values shown as Number(%)

Chi<sup>2</sup> test was used to determine differences across the BMI categories

Fishers Exact test was used when cell count was <5



Table 1(b): Distribution of adverse pregnancy and neonatal outcomes by pre-pregnancy maternal body mass index (BMI) in Qatar (N=1134)

|                                       | Pre-pregnancy BMI category  |                       |                  |                    | Total<br>(N=1134) | P-Value          |
|---------------------------------------|-----------------------------|-----------------------|------------------|--------------------|-------------------|------------------|
|                                       | Normal<br>Weight<br>(N=404) | Overweight<br>(N=399) | Obese<br>(N=230) | Missing<br>(N=101) |                   |                  |
| <b>Pregnancy Outcomes</b>             |                             |                       |                  |                    |                   |                  |
| <b>Gestational Diabetes Mellitus</b>  | 118(29.21%)                 | 140(35.09%)           | 108(46.96%)      | 41(40.59%)         | 407(35.89%)       | <b>&lt;0.001</b> |
| <b>Pregnancy-Induced Hypertension</b> | 14(3.47%)                   | 14(3.51%)             | 17(7.39%)        | 1(0.99%)           | 46(4.06%)         | <b>0.038</b>     |
| <b>Preeclampsia</b>                   | 8(1.98%)                    | 14(3.51%)             | 15(6.52%)        | 2(1.98%)           | 39(3.44%)         | <b>0.013</b>     |
| <b>Preterm Delivery</b>               | 32(7.92%)                   | 40(10.03%)            | 28(12.17%)       | 8(7.92%)           | 108(9.52%)        | 0.21             |
| <b>Assisted Vaginal Delivery</b>      | 66(16.34%)                  | 62(15.54%)            | 40(17.39%)       | 11(10.89%)         | 179(15.78%)       | 0.831            |
| <b>Cesarean Section</b>               | 80(19.8%)                   | 107(26.82%)           | 69(30%)          | 27(26.73%)         | 283(24.96%)       | <b>0.008</b>     |
| <b>Neonatal Outcomes</b>              |                             |                       |                  |                    |                   |                  |
| <b>Macrosomia</b>                     | 11(2.72%)                   | 8(2.01%)              | 13(5.65%)        | 1(0.99%)           | 33(2.91%)         | <b>0.034</b>     |
| <b>Large for Gestational Age</b>      | 25(6.19%)                   | 31(7.77%)             | 23(10%)          | 7(6.93%)           | 86(7.58%)         | 0.22             |
| <b>Small for Gestational Age</b>      | 65(16.09%)                  | 55(13.78%)            | 32(13.91%)       | 22(21.78%)         | 174(15.34%)       | 0.606            |
| <b>NICU referral</b>                  | 36(8.91%)                   | 46(11.53%)            | 22(9.57%)        | 10(9.9%)           | 114(10.05%)       | 0.449            |
| <b>Apgar Score &lt;7 at 1 min,</b>    | 19(4.7%)                    | 17(4.26%)             | 14(6.09%)        | 4(3.96%)           | 54(4.76%)         | 0.582            |

Values shown as Number(%)

Chi<sup>2</sup> test was used to determine differences across the BMI categories

Abbreviations: NICU, neonatal intensive care unit.

Table 2: Odds ratios (ORs) and 95% confidence intervals (CIs) of the association between adverse pregnancy and neonatal pregnancy outcomes and body mass index (BMI) category by ethnicity after multiple imputation (N=1134)

|                                       | Arabs      |                         |             | Non-Arabs  |                         |             |
|---------------------------------------|------------|-------------------------|-------------|------------|-------------------------|-------------|
|                                       | Prevalence | Adjusted OR<br>(95% CI) | P-Value     | Prevalence | Adjusted OR<br>(95% CI) | P-Value     |
| <b>Pregnancy Outcomes</b>             |            |                         |             |            |                         |             |
| <b>Gestational Diabetes Mellitus</b>  |            |                         |             |            |                         |             |
| Overweight                            | 92(34.98%) | 1.24 (0.84 – 1.82)      | 0.28        | 64(36.99%) | 1.23(0.76 – 2.00)       | 0.40        |
| Obese                                 | 66(51.97%) | 2.38 (1.51 – 3.84)      | <0.01       | 54(43.2%)  | 1.60 (0.97 – 2.65)      | 0.07        |
| <b>Pregnancy-Induced Hypertension</b> |            |                         |             |            |                         |             |
| Overweight                            | 11(4.18%)  | 1.66 (0.63 – 4.38)      | 0.31        | 3(1.73%)   | 0.41 (0.11 – 1.61)      | 0.20        |
| Obese                                 | 4(3.15%)   | 1.21 (0.34 – 4.31)      | 0.76        | 13(10.4%)  | 2.41 (0.93 – 6.327)     | 0.07        |
| <b>Preeclampsia</b>                   |            |                         |             |            |                         |             |
| Overweight                            | 6(2.28%)   | 1.11 (0.33 – 3.71)      | 0.86        | 9(5.2%)    | 2.56 (0.66 – 9.97)      | 0.18        |
| Obese                                 | 7(5.51%)   | 2.64 (0.81 – 8.65)      | 0.11        | 8(6.4%)    | 3.83 (0.98 – 15.00)     | <b>0.05</b> |
| <b>Preterm Delivery</b>               |            |                         |             |            |                         |             |
| Overweight                            | 26(9.89%)  | 1.26 (0.66 – 2.41)      | 0.48        | 18(10.4%)  | 1.22 (0.57 – 2.61)      | 0.61        |
| Obese                                 | 14(11.02%) | 1.35 (0.63 – 2.91)      | 0.45        | 17(13.6%)  | 1.69 (0.78 – 3.68)      | 0.18        |
| <b>Assisted Vaginal Delivery</b>      |            |                         |             |            |                         |             |
| Overweight                            | 38(14.45%) | 0.94 (0.57 – 1.55)      | 0.82        | 28(16.18%) | 0.87 (0.48 – 1.58)      | 0.65        |
| Obese                                 | 20(15.75%) | 1.01 (0.55 – 1.86)      | 0.97        | 22(17.6%)  | 0.97 (0.52 – 1.81)      | 0.93        |
| <b>Cesarean Section</b>               |            |                         |             |            |                         |             |
| Overweight                            | 66(25.1%)  | 1.57 (1.00 – 2.48)      | <b>0.05</b> | 51(29.48%) | 1.05 (0.64 – 1.74)      | 0.83        |
| Obese                                 | 32(25.2%)  | 1.46 (0.83 – 2.53)      | 0.20        | 45(36%)    | 1.43 (0.84 – 2.44)      | 0.19        |
| <b>Neonatal Outcomes</b>              |            |                         |             |            |                         |             |
| <b>Macrosomia</b>                     |            |                         |             |            |                         |             |
| Overweight                            | 7(2.66%)   | 0.86 (0.30 – 2.42)      | 0.77        | 1(0.58%)   | 0.37 (0.04 – 3.39)      | 0.38        |
| Obese                                 | 6(4.72%)   | 1.48 (0.49 – 4.48)      | 0.49        | 7(5.6%)    | 3.05 (0.77 – 12.06)     | 0.11        |
| <b>Large for Gestational Age</b>      |            |                         |             |            |                         |             |
| Overweight                            | 19(7.22%)  | 1.06 (0.53 – 2.14)      | 0.87        | 15(8.67%)  | 1.52 (0.61 – 3.79)      | 0.37        |
| Obese                                 | 13(10.24%) | 1.46 (0.66 – 3.20)      | 0.35        | 12(9.6%)   | 1.75 (0.70 – 4.41)      | 0.23        |
| <b>Small for Gestational Age</b>      |            |                         |             |            |                         |             |
| Overweight                            | 34(12.93%) | 0.84 (0.49 – 1.43)      | 0.52        | 30(17.34%) | 0.93 (0.52 – 1.67)      | 0.82        |
| Obese                                 | 17(13.39%) | 0.90 (0.44 – 1.82)      | 0.77        | 19(15.2%)  | 0.84 (0.44 – 1.60)      | 0.59        |
| <b>NICU referral</b>                  |            |                         |             |            |                         |             |
| Overweight                            | 26(9.89%)  | 1.15 (0.63 – 2.11)      | 0.65        | 23(13.29%) | 1.30 (0.64 – 2.64)      | 0.46        |
| Obese                                 | 8(6.3%)    | 0.64 (0.26 – 1.55)      | 0.32        | 17(13.6%)  | 1.30 (0.61 – 2.77)      | 0.49        |
| <b>Apgar Score &lt;7 at 1 min.</b>    |            |                         |             |            |                         |             |
| Overweight                            | 13(4.94%)  | 1.24 (0.53 – 2.92)      | 0.63        | 6(3.47%)   | 0.59 (0.19 – 1.80)      | 0.47        |
| Obese                                 | 8(6.3%)    | 1.72 (0.66 – 4.46)      | 0.27        | 6(4.8%)    | 0.86 (0.30 – 2.48)      | 0.50        |

For each ethnic group, normal weight was considered the reference category (OR = 1) for calculating ORs.

All outcomes were adjusted for maternal age at first antenatal visit. In addition: pre-eclampsia for pre-existing diabetes, and pre-existing hypertension, preterm delivery for pre-existing comorbid conditions, assisted vaginal delivery for pre-existing comorbid conditions, caesarean section for pre-existing comorbid conditions, macrosomia for pre-existing diabetes, large for gestational age for pre-existing diabetes, and small for gestational age was adjusted for pre-existing diabetes and pre-existing hypertension. NICU, neonatal intensive care unit.

Table 3: Population attributable fractions (PAFs) % and 95% confidence intervals (CI) of adverse pregnancy and neonatal outcomes by pre-pregnancy body mass index among Arab mothers

|                                       | All to Normal Weight<br>(Scenario 1) | Obese to Overweight<br>(Scenario 2) | Overweight to Normal<br>(Scenario 2) |
|---------------------------------------|--------------------------------------|-------------------------------------|--------------------------------------|
| <b>Pregnancy Outcomes</b>             |                                      |                                     |                                      |
| <b>Gestational Diabetes</b>           | 13.64 (2.81 to 23.27)                | 24.72 (8.88 to 37.8)                | 12.52 (-7.28 to 28.66)               |
| <b>Pregnancy-Induced Hypertension</b> | 14.62 (-28.68 to 43.35)              | <b>50.83 (1.46 to 75.46)</b>        | -3.46 (-116.78 to 50.63)             |
| <b>Preeclampsia</b>                   | <b>40.26 (-8.34 to 67.06)</b>        | <b>46.28 (-8.98 to 73.52)</b>       | <b>38.61 (-45.72 to 74.14)</b>       |
| <b>Preterm Delivery</b>               | 15.04 (-11.09 to 35.03)              | 16.02 (-33.05 to 46.99)             | 18.14 (-28.65 to 47.91)              |
| <b>Assisted Vaginal Delivery</b>      | -3.11 (-22.13 to 12.95)              | 8.23 (-32.19 to 36.29)              | -8.5 (-50.1 to 21.57)                |
| <b>Cesarean Section</b>               | 14.09 (-0.9 to 26.86)                | 7.14 (-21.13 to 28.81)              | 19.24 (-5.27 to 38.03)               |
| <b>Neonatal Outcomes</b>              |                                      |                                     |                                      |
| <b>Macrosomia</b>                     | 6.78 (-47.09 to 40.91)               | <b>65.23 (17.74 to 85.31)</b>       | -44.54 (-257.57 to 41.58)            |
| <b>Large for Gestational Age</b>      | 16.03 (-13.93 to 38.11)              | 22.26 (-29.92 to 53.48)             | 17.23 (-38.3 to 50.46)               |
| <b>Small for Gestational Age</b>      | -7.96 (-27.51 to 8.59)               | -1.19 (-53.4 to 33.24)              | -14.47 (-61.48 to 18.85)             |
| <b>NICU referral</b>                  | 7.91 (-18.08 to 28.18)               | -25.28 (-104.33 to 23.18)           | 18.37 (-24.71 to 46.57)              |
| <b>Apgar Score &lt;7 at 1 min.</b>    | 1.67 (-37.59 to 29.73)               | <b>30.42 (-38.63 to 65.08)</b>      | -10.89 (-111.84 to 41.95)            |

Abbreviations: NICU, neonatal intensive care unit

Table 4: Population attributable fractions (PAFs) % and 95% confidence intervals (CI) of adverse pregnancy and neonatal outcomes by pre-pregnancy body mass index among non-Arab mothers

|                                        | All to Normal Weight          | Obese to Overweight            | Overweight to Normal           |
|----------------------------------------|-------------------------------|--------------------------------|--------------------------------|
| <b>Pregnancy Outcomes</b>              |                               |                                |                                |
| <b>Gestational Diabetes</b>            | 16.2 (4.79 to 26.23)          | 24.58 (8.6 to 37.77)           | 12.18 (-7.12 to 28)            |
| <b>Pregnancy -Induced Hypertension</b> | 19.98 (-26.05 to 49.2)        | <b>50.24 (1.25 to 74.93)</b>   | -3.41 (-114.55 to 50.16)       |
| <b>Preeclampsia</b>                    | <b>42.92 (-5.47 to 69.11)</b> | <b>46.42 (-9.27 to 73.73)</b>  | <b>37.79 (-44.56 to 73.23)</b> |
| <b>Preterm Delivery</b>                | 16.89 (-10.67 to 37.59)       | 15.8 (-32.54 to 46.51)         | 17.86 (-28.14 to 47.34)        |
| <b>Assisted Delivery</b>               | -2.81 (-23.22 to 14.22)       | 8.14 (-31.83 to 36)            | -8.27 (-48.48 to 21.06)        |
| <b>Cesarean Section</b>                | 13.89 (-0.47 to 26.2)         | 6.48 (-18.95 to 26.47)         | 17.19 (-4.73 to 34.53)         |
| <b>Neonatal Outcomes</b>               |                               |                                |                                |
| <b>Macrosomia</b>                      | 13.73 (-46.3 to 49.13)        | <b>65.86 (17.93 to 85.8)</b>   | -45.01 (-261.54 to 41.84)      |
| <b>Large for Gestational Age</b>       | 18.86 (-13.59 to 42.04)       | 22.44 (-30.35 to 53.85)        | 17.29 (-38.52 to 50.62)        |
| <b>Small for Gestational Age</b>       | -8.73 (-30.31 to 9.27)        | -1.13 (-50.1 to 31.86)         | -13.69 (-57.58 to 17.98)       |
| <b>NICU referral</b>                   | 7.09 (-20.53 to 28.37)        | -24.49 (-100.23 to 22.59)      | 17.79 (-23.81 to 45.41)        |
| <b>Apgar Score &lt; 7</b>              | 4.25 (-40 to 34.51)           | <b>30.53 (-38.95 to 65.27)</b> | -10.93 (-112.38 to 42.06)      |

Abbreviations: NICU, neonatal intensive care unit



1  
2  
3  
4  
5  
6  
7  
8  
9  
10  
11  
12  
13  
14  
15  
16  
17  
18  
19  
20  
21  
22  
23  
24  
25  
26  
27  
28  
29  
30  
31  
32  
33  
34  
35  
36  
37  
38  
39  
40  
41  
42  
43  
44  
45  
46  
47  
48  
49  
50  
51  
52  
53  
54  
55  
56  
57  
58  
59  
60



1  
2  
3  
4  
5  
6  
7  
8  
9  
10  
11  
12  
13  
14  
15  
16  
17  
18  
19  
20  
21  
22  
23  
24  
25  
26  
27  
28  
29  
30  
31  
32  
33  
34  
35  
36  
37  
38  
39  
40  
41  
42  
43  
44  
45  
46  
47  
48  
49  
50  
51  
52  
53  
54  
55  
56  
57  
58  
59  
60



1  
2  
3  
4  
5  
6  
7  
8  
9  
10  
11  
12  
13  
14  
15  
16  
17  
18  
19  
20  
21  
22  
23  
24  
25  
26  
27  
28  
29  
30  
31  
32  
33  
34  
35  
36  
37  
38  
39  
40  
41  
42  
43  
44  
45  
46  
47  
48  
49  
50  
51  
52  
53  
54  
55  
56  
57  
58  
59  
60





STROBE Statement—Checklist of items that should be included in reports of *cohort studies*

|                              | Item No | Recommendation                                                                                                                                                                                                                                                                                                                      |
|------------------------------|---------|-------------------------------------------------------------------------------------------------------------------------------------------------------------------------------------------------------------------------------------------------------------------------------------------------------------------------------------|
| <b>Title and abstract</b>    | 1       | (a) Indicate the study's design with a commonly used term in the title or the abstract<br><i>Done, title page</i>                                                                                                                                                                                                                   |
|                              |         | (b) Provide in the abstract an informative and balanced summary of what was done and what was found<br><i>Done, page 2</i>                                                                                                                                                                                                          |
| <b>Introduction</b>          |         |                                                                                                                                                                                                                                                                                                                                     |
| Background/rationale         | 2       | Explain the scientific background and rationale for the investigation being reported<br><i>Done, page 4</i>                                                                                                                                                                                                                         |
| Objectives                   | 3       | State specific objectives, including any pre-specified hypotheses<br><i>Done, page 4</i>                                                                                                                                                                                                                                            |
| <b>Methods</b>               |         |                                                                                                                                                                                                                                                                                                                                     |
| Study design                 | 4       | Present key elements of study design early in the paper<br><i>Done, Abstract and page 6</i>                                                                                                                                                                                                                                         |
| Setting                      | 5       | Describe the setting, locations, and relevant dates, including periods of recruitment, exposure, follow-up, and data collection<br><i>Done, methods section, page 6</i>                                                                                                                                                             |
| Participants                 | 6       | (a) Give the eligibility criteria, and the sources and methods of selection of participants. Describe methods of follow-up<br><i>Done, methods section, page 6</i>                                                                                                                                                                  |
|                              |         | (b) For matched studies, give matching criteria and number of exposed and unexposed                                                                                                                                                                                                                                                 |
| Variables                    | 7       | Clearly define all outcomes, exposures, predictors, potential confounders, and effect modifiers. Give diagnostic criteria, if applicable<br><i>Done, methods section, page 7</i>                                                                                                                                                    |
| Data sources/<br>measurement | 8*      | For each variable of interest, give sources of data and details of methods of assessment (measurement). Describe comparability of assessment methods if there is more than one group<br><i>Data source and methods of assessment of exposure and outcomes are presented in in the methods section page 6</i>                        |
| Bias                         | 9       | Describe any efforts to address potential sources of bias<br><i>Potential sources of bias are explained on page 13</i>                                                                                                                                                                                                              |
| Study size                   | 10      | Explain how the study size was arrived at<br><i>All nulliparous women with singleton pregnancies who had their first antenatal visit at a PHCC facility between 1 June 2016 and 1 March 2017 and their pregnancy outcome at a HMC facility before 10 November 2017 (n=1245) were included in this study, methods section page 6</i> |
| Quantitative variables       | 11      | Explain how quantitative variables were handled in the analyses. If applicable, describe which groupings were chosen and why<br><i>All quantitative variables included in analysis with details of variables that have been categorized are presented in methods section page 6-8</i>                                               |
| Statistical methods          | 12      | (a) Describe all statistical methods, including those used to control for confounding<br><i>Done, all statistical methods to control for confounding on page 8-9</i>                                                                                                                                                                |
|                              |         | (b) Describe any methods used to examine subgroups and interactions<br><i>Done, multivariable logistic regression analysis and population attributable fractions were used to adjust for overweight and obesity for Arab and non-Arab mothers , pages 7-8</i>                                                                       |

|    |                          |                                                                                           |
|----|--------------------------|-------------------------------------------------------------------------------------------|
| 1  |                          | (c) Explain how missing data were addressed                                               |
| 2  |                          | Done, multiple imputation was used to handle missing data, page 8                         |
| 3  |                          |                                                                                           |
| 4  |                          | (d) If applicable, explain how loss to follow-up was addressed                            |
| 5  |                          | Not applicable                                                                            |
| 6  |                          |                                                                                           |
| 7  |                          | (e) Describe any sensitivity analyses                                                     |
| 8  |                          | Sensitivity analysis was not applied                                                      |
| 9  | <b>Results</b>           |                                                                                           |
| 10 | Participants             | 13*                                                                                       |
| 11 |                          | (a) Report numbers of individuals at each stage of study—eg numbers potentially           |
| 12 |                          | eligible, examined for eligibility, confirmed eligible, included in the study,            |
| 13 |                          | completing follow-up, and analysed                                                        |
| 14 |                          | Done, methods section page 5                                                              |
| 15 |                          | (b) Give reasons for non-participation at each stage                                      |
| 16 |                          | Done, page 5                                                                              |
| 17 |                          |                                                                                           |
| 18 |                          | (c) Consider use of a flow diagram                                                        |
| 19 |                          | Flow diagram was not needed                                                               |
| 20 | Descriptive data         | 14*                                                                                       |
| 21 |                          | (a) Give characteristics of study participants (eg demographic, clinical, social) and     |
| 22 |                          | information on exposures and potential confounders                                        |
| 23 |                          | Done, table 1 and results section page 9-10                                               |
| 24 |                          | (b) Indicate number of participants with missing data for each variable of interest       |
| 25 |                          | Done, table 1, results page 9                                                             |
| 26 |                          |                                                                                           |
| 27 |                          | (c) Summarise follow-up time (eg, average and total amount)                               |
| 28 |                          | Not applicable                                                                            |
| 29 | Outcome data             | 15*                                                                                       |
| 30 |                          | Report numbers of outcome events or summary measures over time                            |
| 31 |                          | Not applicable                                                                            |
| 32 | Main results             | 16                                                                                        |
| 33 |                          | (a) Give unadjusted estimates and, if applicable, confounder-adjusted estimates and       |
| 34 |                          | their precision (eg, 95% confidence interval). Make clear which confounders were          |
| 35 |                          | adjusted for and why they were included                                                   |
| 36 |                          | Done, tables 2,3, 4, and results section, pages 10-11                                     |
| 37 |                          | (b) Report category boundaries when continuous variables were categorized                 |
| 38 |                          | Done, page 7                                                                              |
| 39 |                          | (c) If relevant, consider translating estimates of relative risk into absolute risk for a |
| 40 |                          | meaningful time period                                                                    |
| 41 |                          | Not applicable                                                                            |
| 42 |                          |                                                                                           |
| 43 | Other analyses           | 17                                                                                        |
| 44 |                          | Report other analyses done—eg analyses of subgroups and interactions, and                 |
| 45 |                          | sensitivity analyses                                                                      |
| 46 |                          | Done, pages 9-10                                                                          |
| 47 | <b>Discussion</b>        |                                                                                           |
| 48 | Key results              | 18                                                                                        |
| 49 |                          | Summarise key results with reference to study objectives                                  |
| 50 |                          | Done, 12-15                                                                               |
| 51 | Limitations              | 19                                                                                        |
| 52 |                          | Discuss limitations of the study, taking into account sources of potential bias or        |
| 53 |                          | imprecision. Discuss both direction and magnitude of any potential bias                   |
| 54 |                          | Done, page 13-14                                                                          |
| 55 | Interpretation           | 20                                                                                        |
| 56 |                          | Give a cautious overall interpretation of results considering objectives, limitations,    |
| 57 |                          | multiplicity of analyses, results from similar studies, and other relevant evidence       |
| 58 |                          | Done, pages 14-15                                                                         |
| 59 | Generalisability         | 21                                                                                        |
| 60 |                          | Discuss the generalisability (external validity) of the study results                     |
|    |                          | Done, page 15                                                                             |
|    | <b>Other information</b> |                                                                                           |

---

|         |    |                                                                                                                                                               |
|---------|----|---------------------------------------------------------------------------------------------------------------------------------------------------------------|
| Funding | 22 | Give the source of funding and the role of the funders for the present study and, if applicable, for the original study on which the present article is based |
|---------|----|---------------------------------------------------------------------------------------------------------------------------------------------------------------|

---

Done, funding statement is presented after discussion

---

\*Give information separately for exposed and unexposed groups.

**Note:** An Explanation and Elaboration article discusses each checklist item and gives methodological background and published examples of transparent reporting. The STROBE checklist is best used in conjunction with this article (freely available on the Web sites of PLoS Medicine at <http://www.plosmedicine.org/>, Annals of Internal Medicine at <http://www.annals.org/>, and Epidemiology at <http://www.epidem.com/>). Information on the STROBE Initiative is available at <http://www.strobe-statement.org>.

For peer review only
